# Supplementary material for: Stereoselective Synthesis of 24-Fluoro-25-Hydroxyvitamin D3 Analogues and Their Stability to hCYP24A1-Dependent Catabolism
Source: MDPI journal article supplement (doi:10.3390/ijms222111863), 2021-11-01

## Supporting Information

# Stereoselective Synthesis of 24-Fluoro-25-Hydroxyvitamin D<sub>3</sub> Analogues and Their Stability to hCYP24A1-dependent Catabolism

Fumihiro Kawagoe,<sup>1</sup> Sayuri Mototani,<sup>1</sup> Kaori Yasuda,<sup>2</sup>

Hiroki Mano,<sup>2</sup> Toshiyuki Sakaki,<sup>2</sup> and Atsushi Kittaka\*,<sup>1</sup>

*1 Faculty of Pharmaceutical Sciences, Teikyo University, 2-11-1 Kaga, Itabashi, Tokyo 173-8605, Japan;*

*2 Faculty of Engineering, Toyama Prefectural University, Imizu, Toyama 939-0398, Japan;*

\* Corresponding author. Tel.: +81-3-3964-8109; Fax: +81-3-3964-8117.

E-mail address: [akittaka@pharm.teikyo-u.ac.jp](mailto:akittaka@pharm.teikyo-u.ac.jp) (A. Kittaka).

### Contents

Title page S1

<sup>1</sup>H and <sup>13</sup>C NMR spectra of all new compounds:

**19-21, 24, 25, 28-31, 9-12, 15, 16, 3, 4, 36, and 37.**

S2-S39

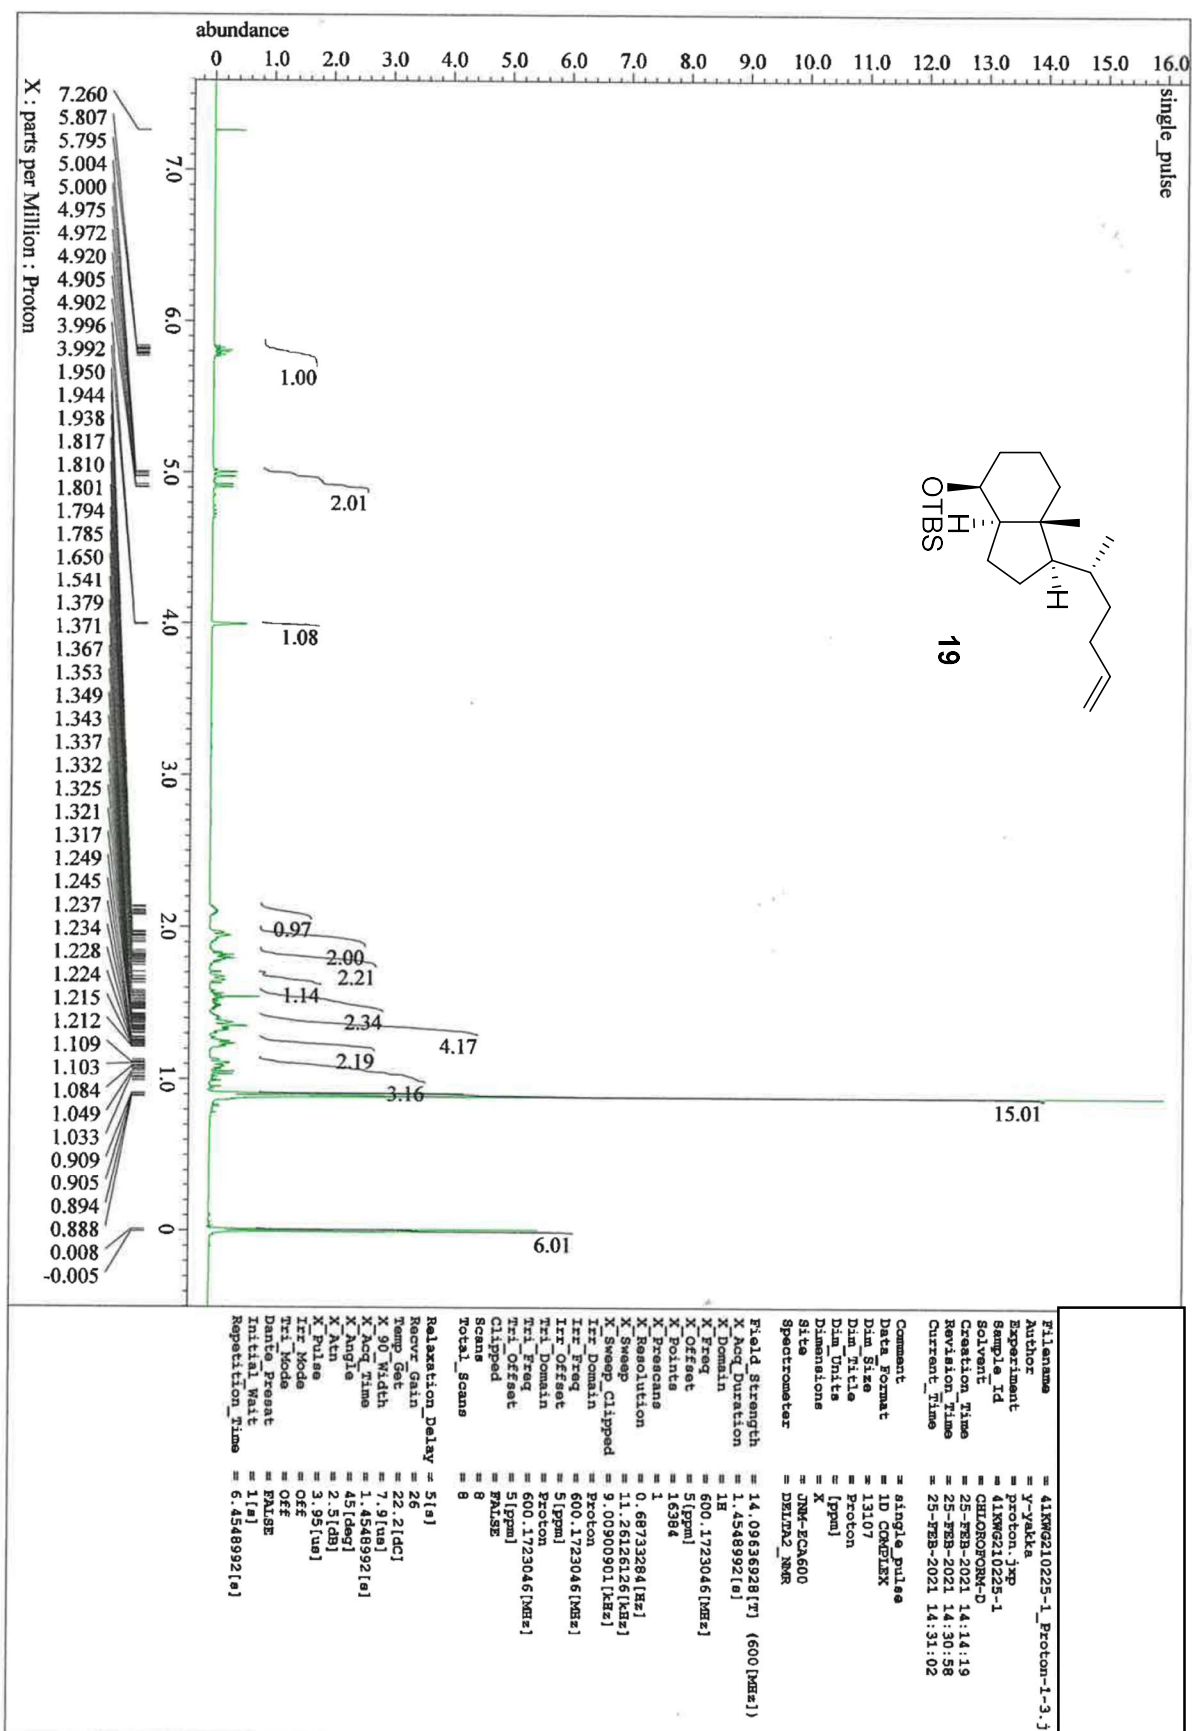

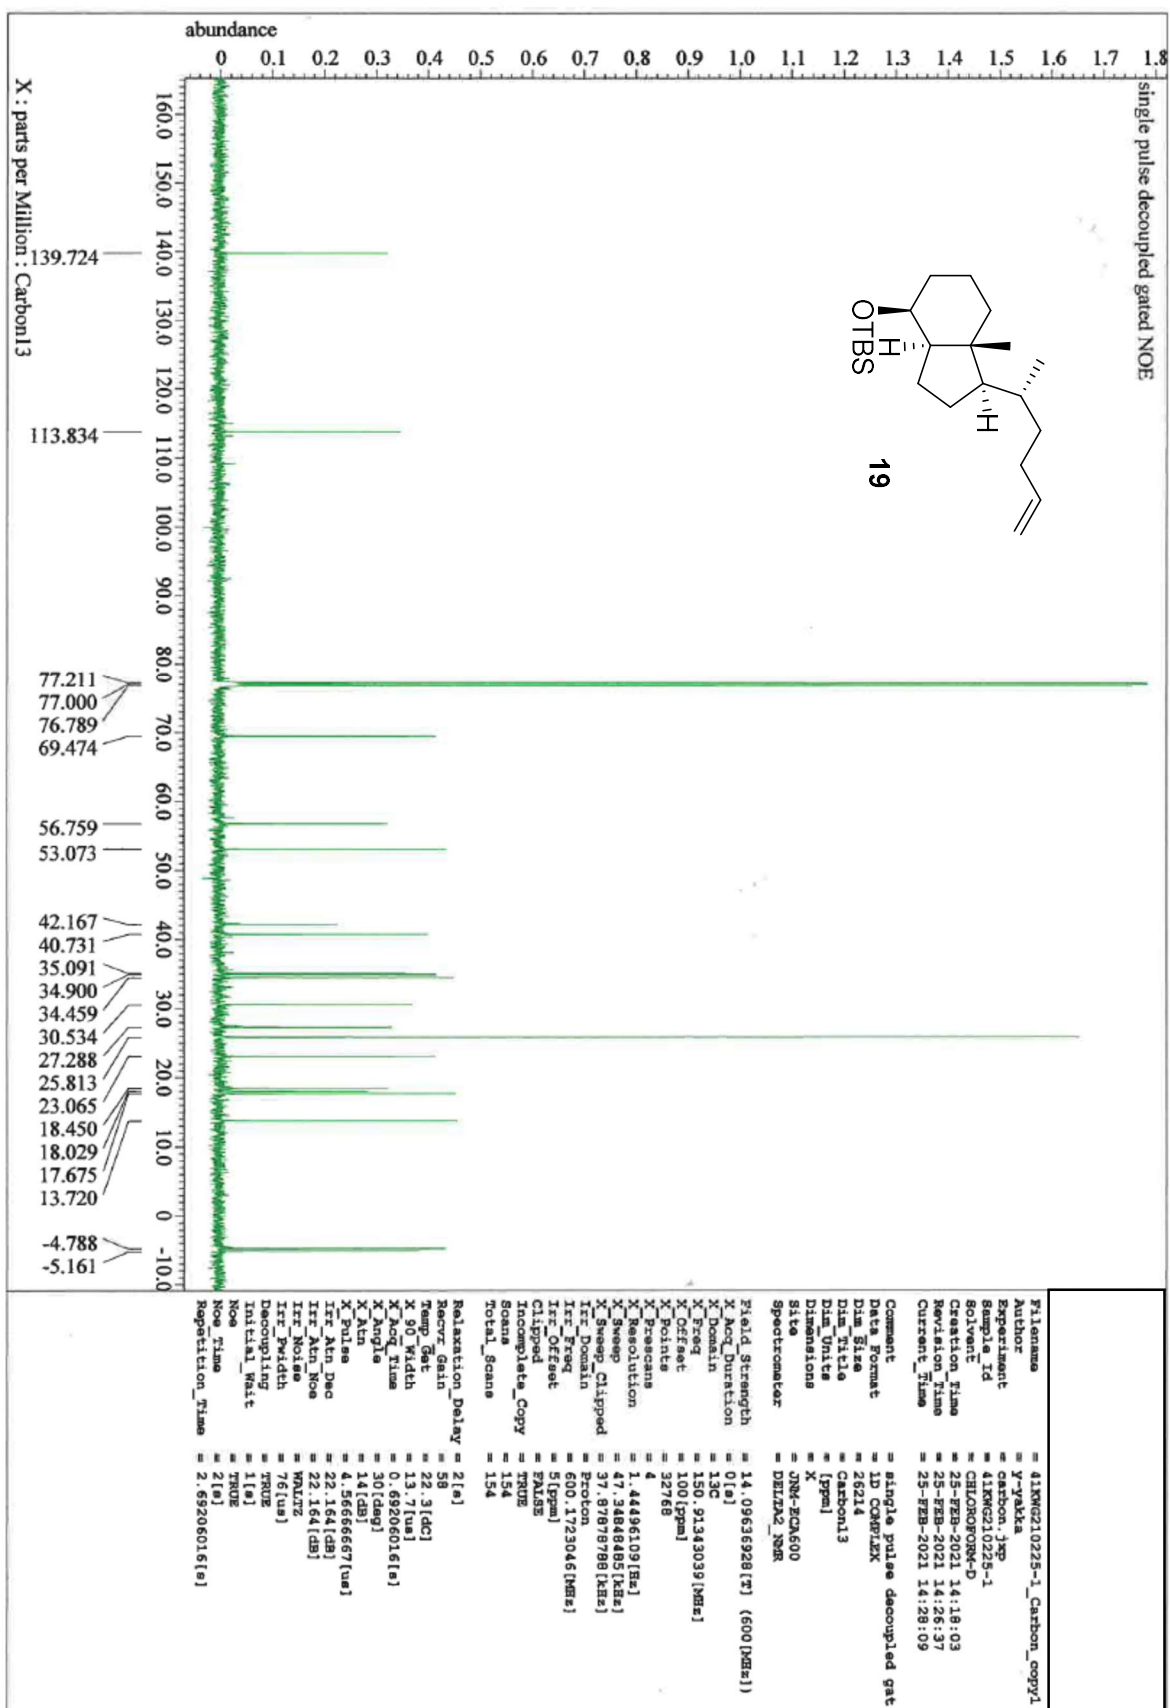

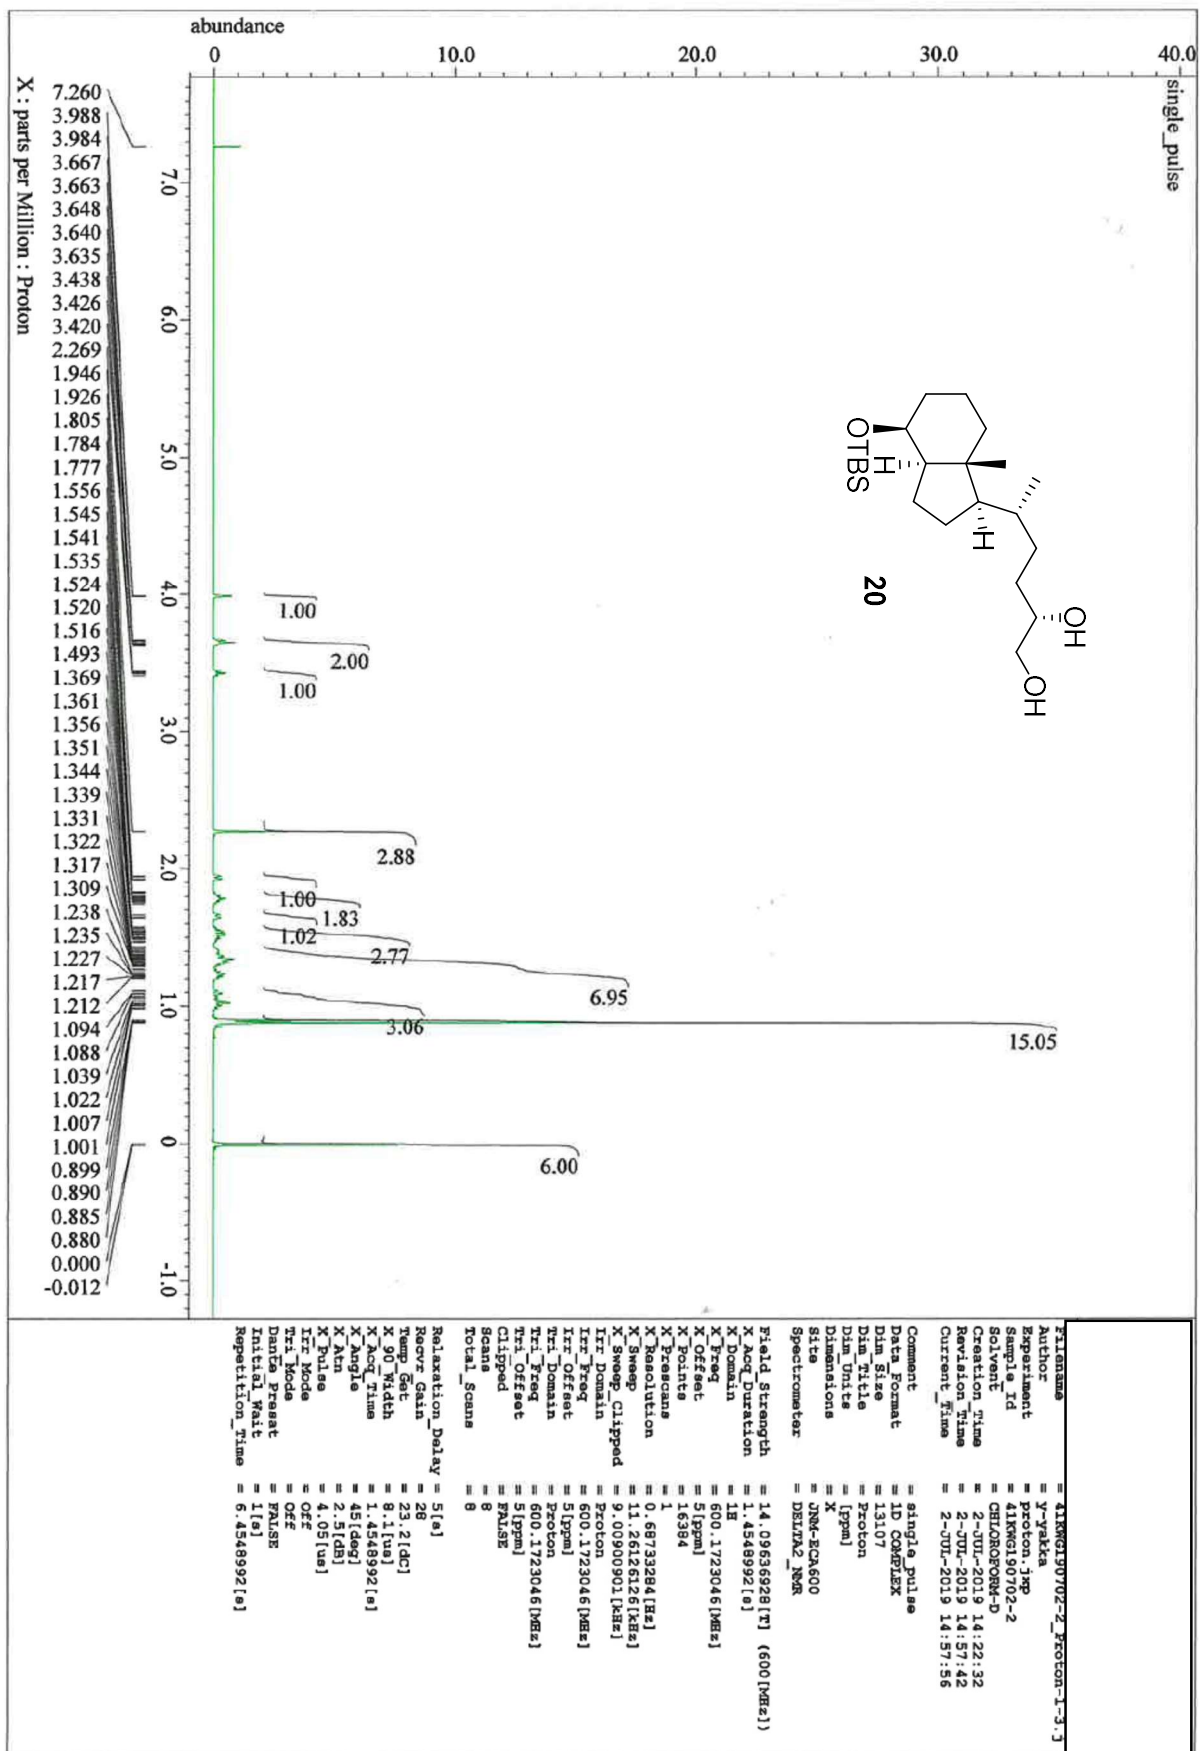



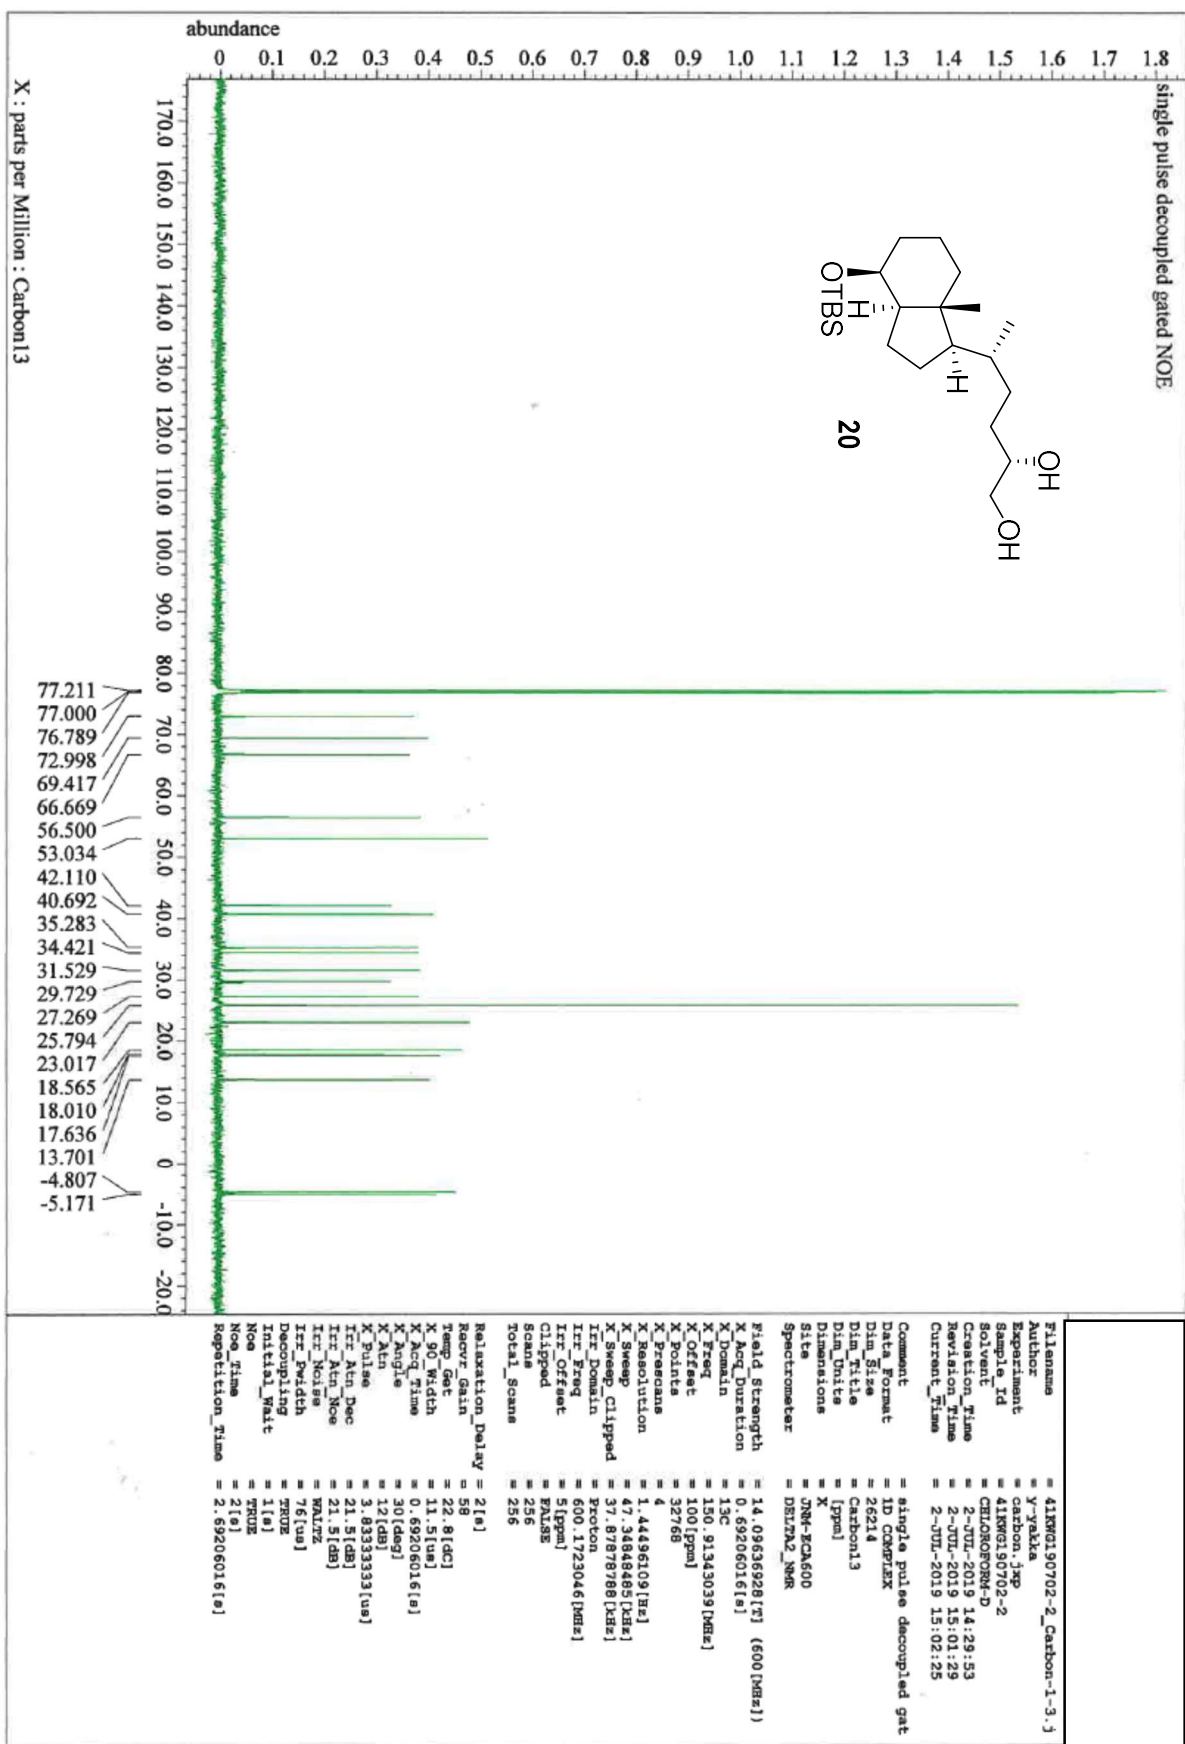





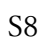





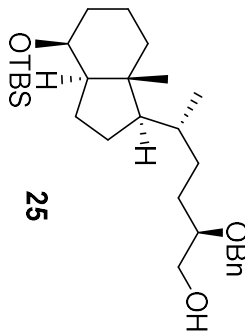



single pulse decoupled gated NOE

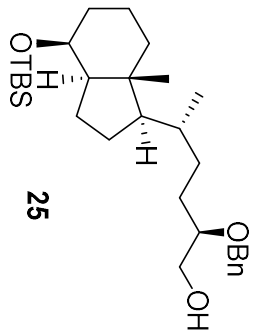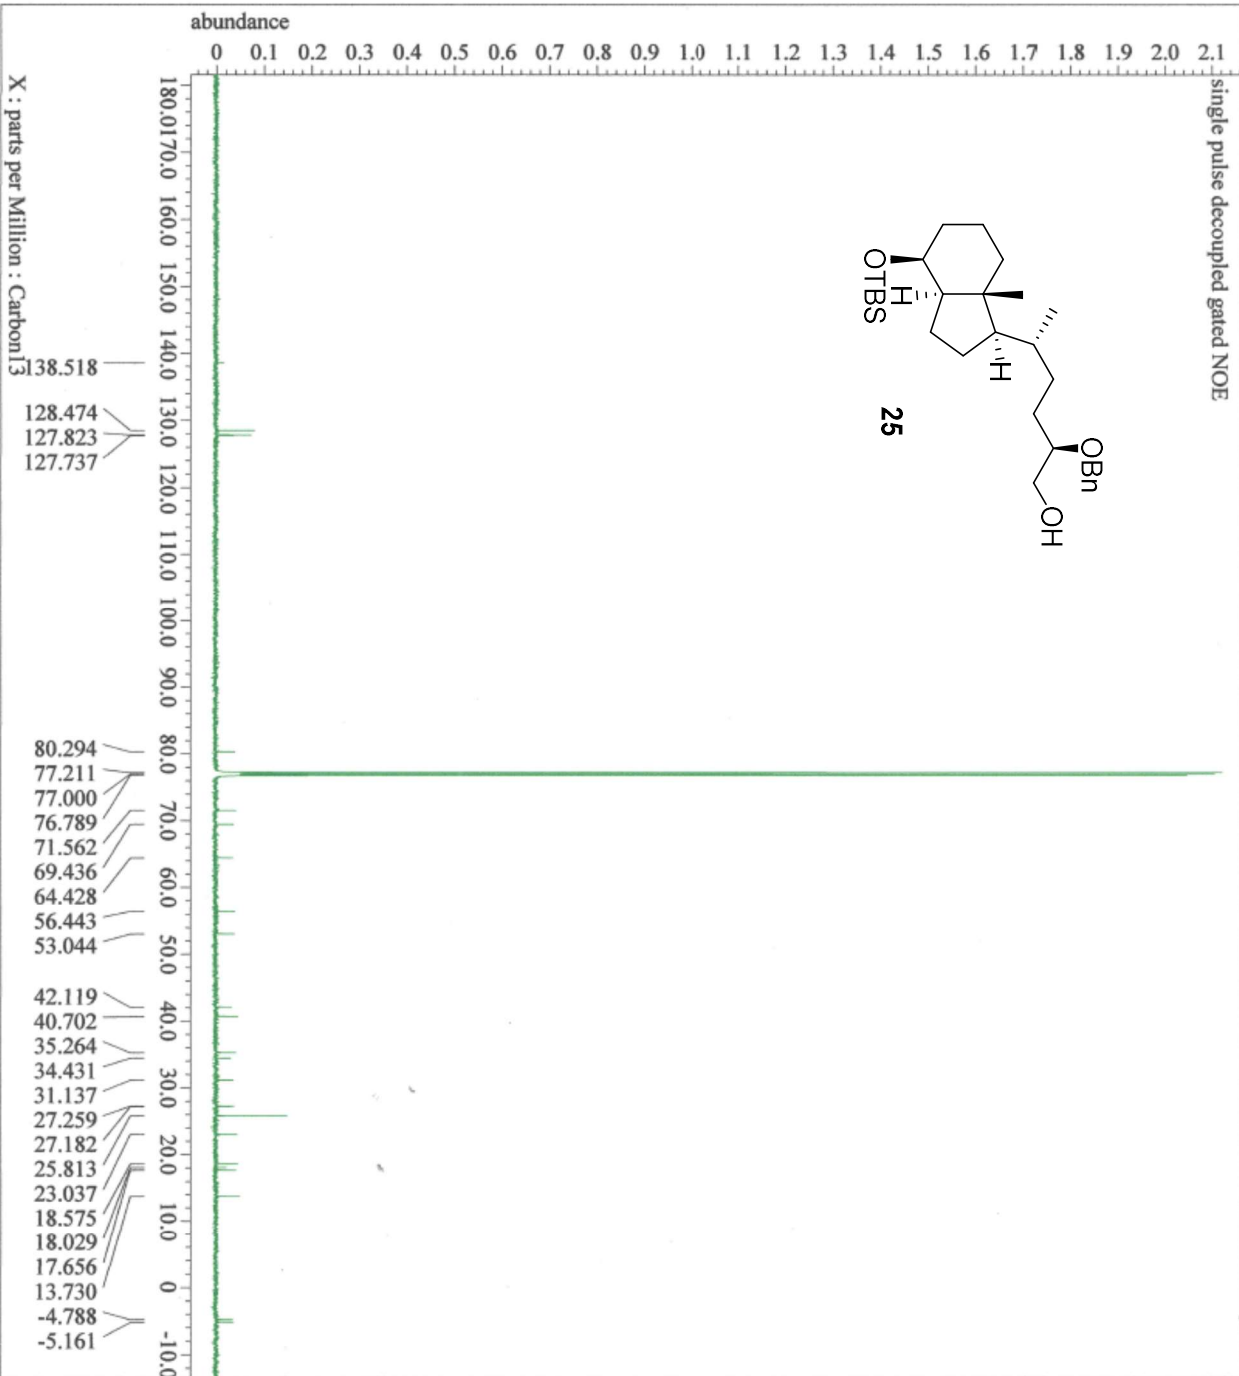

|                  |                              |
|------------------|------------------------------|
| Filename         | = 41KMG190621-24R-OBn-OH_Car |
| Author           | = y-yakka                    |
| Experiment       | = carbon_jmp                 |
| Sample_Id        | = 41KMG190621-24R-OBn-OH     |
| Solvent          | = CHLOROFORM-D               |
| Creation_Time    | = 21-JUN-2019 11:22:13       |
| Revision_Time    | = 21-JUN-2019 12:32:11       |
| Current_Time     | = 21-JUN-2019 12:32:52       |
| Comment          | = single pulse decoupled gat |
| Data_Format      | = ID COMPLEX                 |
| Dir_Size         | = 26214                      |
| Dir_Title        | = Carbon13                   |
| Dir_Units        | = [ppm]                      |
| Dimensions       | = X                          |
| Site             | = JNM-ECX600                 |
| Spectrometer     | = DELTA2_NMR                 |
| Field_Strength   | = 14.09636928[T] (600[Mhz])  |
| X_Acq_Duration   | = 0.69206016[s]              |
| X_Domain         | = 13C                        |
| X_Freq           | = 150.91343039 [Mhz]         |
| X_Offset         | = 100 [ppm]                  |
| X_Points         | = 32768                      |
| X_Prescans       | = 4                          |
| X_Resolution     | = 1.44496109 [Hz]            |
| X_Sweep_Clippped | = 47.34848485 [KHz]          |
| X_Sweep_Domain   | = 37.87878788 [KHz]          |
| X_Freq           | = 600.1723046 [Mhz]          |
| X_Offset         | = 5 [ppm]                    |
| Clipped          | = FALSE                      |
| Scans            | = 1500                       |
| Total_Scans      | = 1500                       |
| Relaxation_Delay | = 2 [s]                      |
| Recvr_Gain       | = 60                         |
| Temp_Gat         | = 23.4 [deg]                 |
| X_90_Width       | = 11.5 [us]                  |
| X_Acq_Time       | = 0.69206016 [s]             |
| X_Angle          | = 30 [deg]                   |
| X_Atn            | = 12 [db]                    |
| X_Pulse          | = 3.83333333 [us]            |
| X_Atn_Dec        | = 21.5 [db]                  |
| X_Atn_Noise      | = 21.5 [db]                  |
| X_Valtz          | = VALTZ                      |
| X_Pwldth         | = 76 [us]                    |
| Decoupling       | = TRUE                       |
| Initial_Wait     | = 1 [s]                      |
| Noe_Time         | = 2 [s]                      |
| Repetition_Time  | = 2.69206016 [s]             |















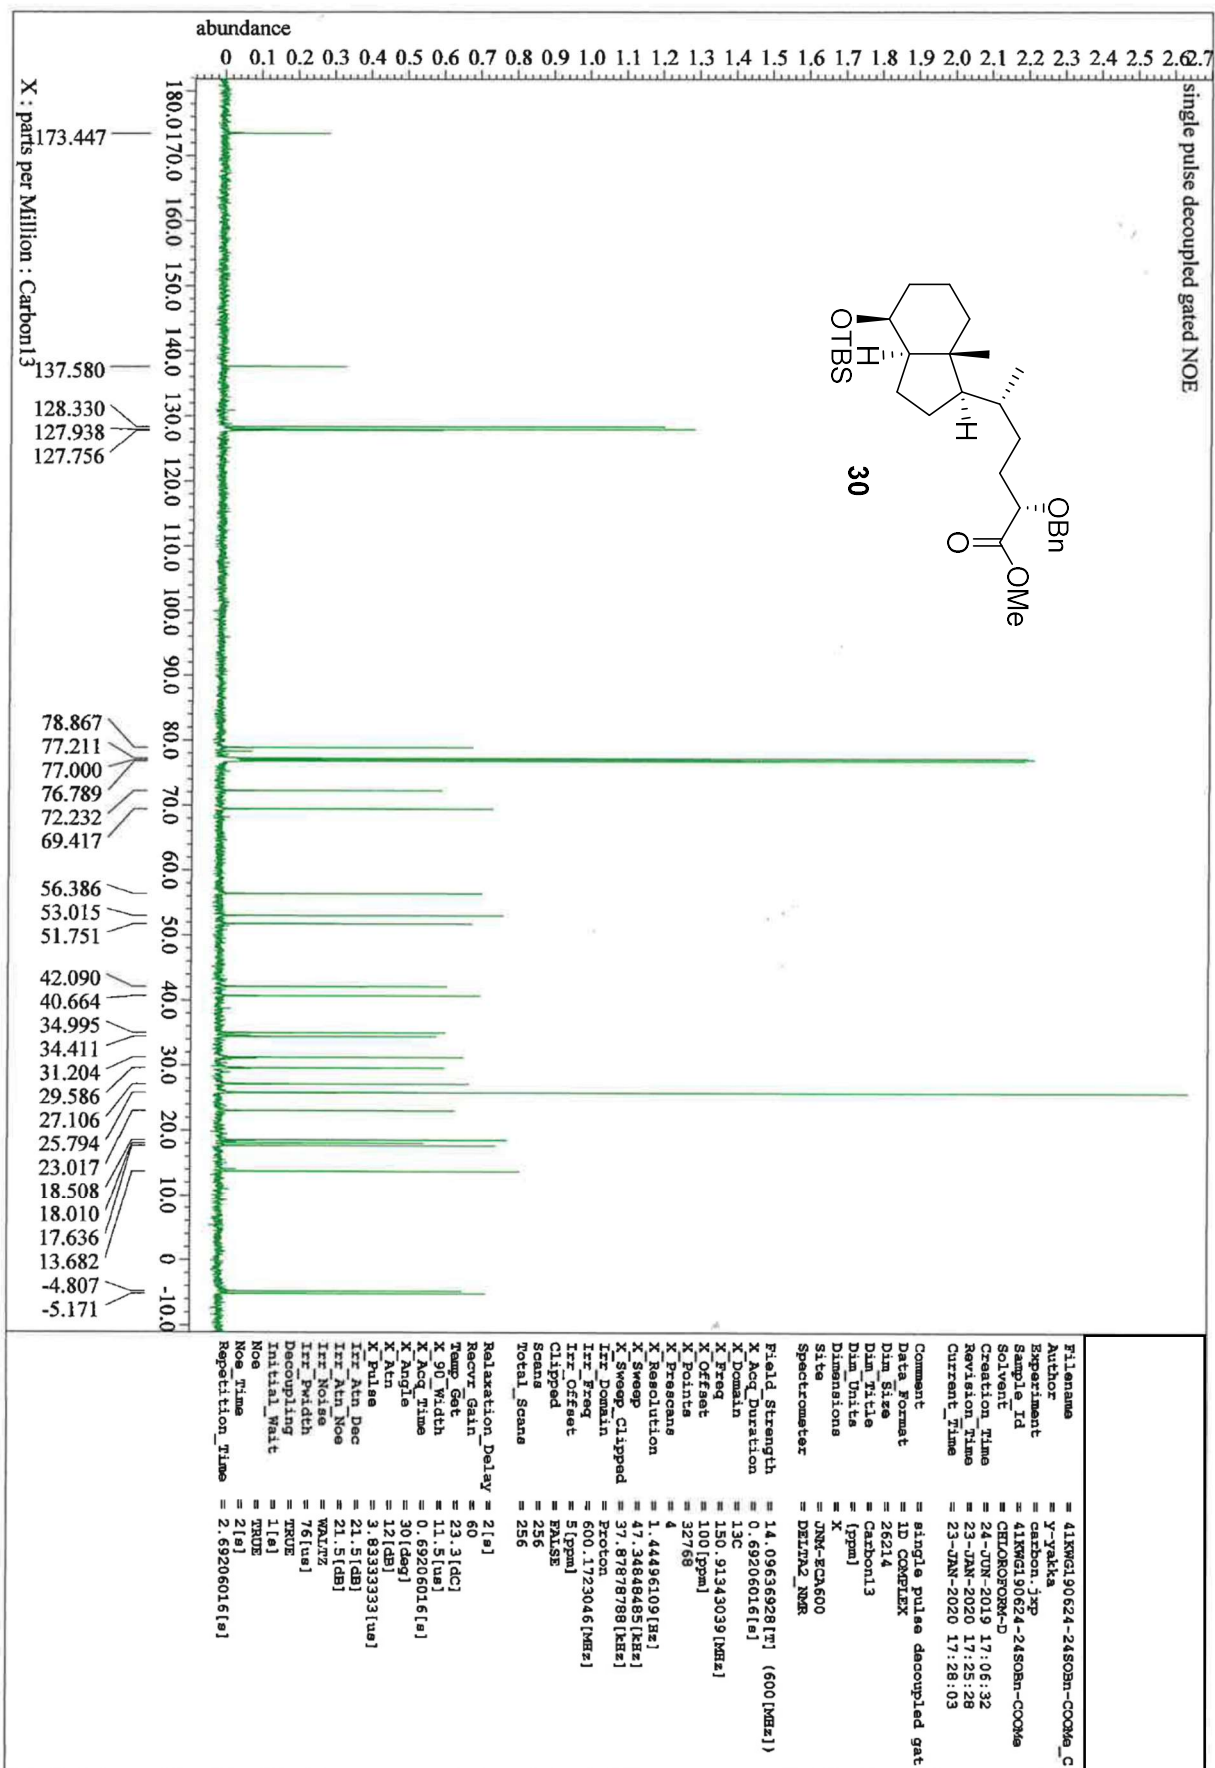





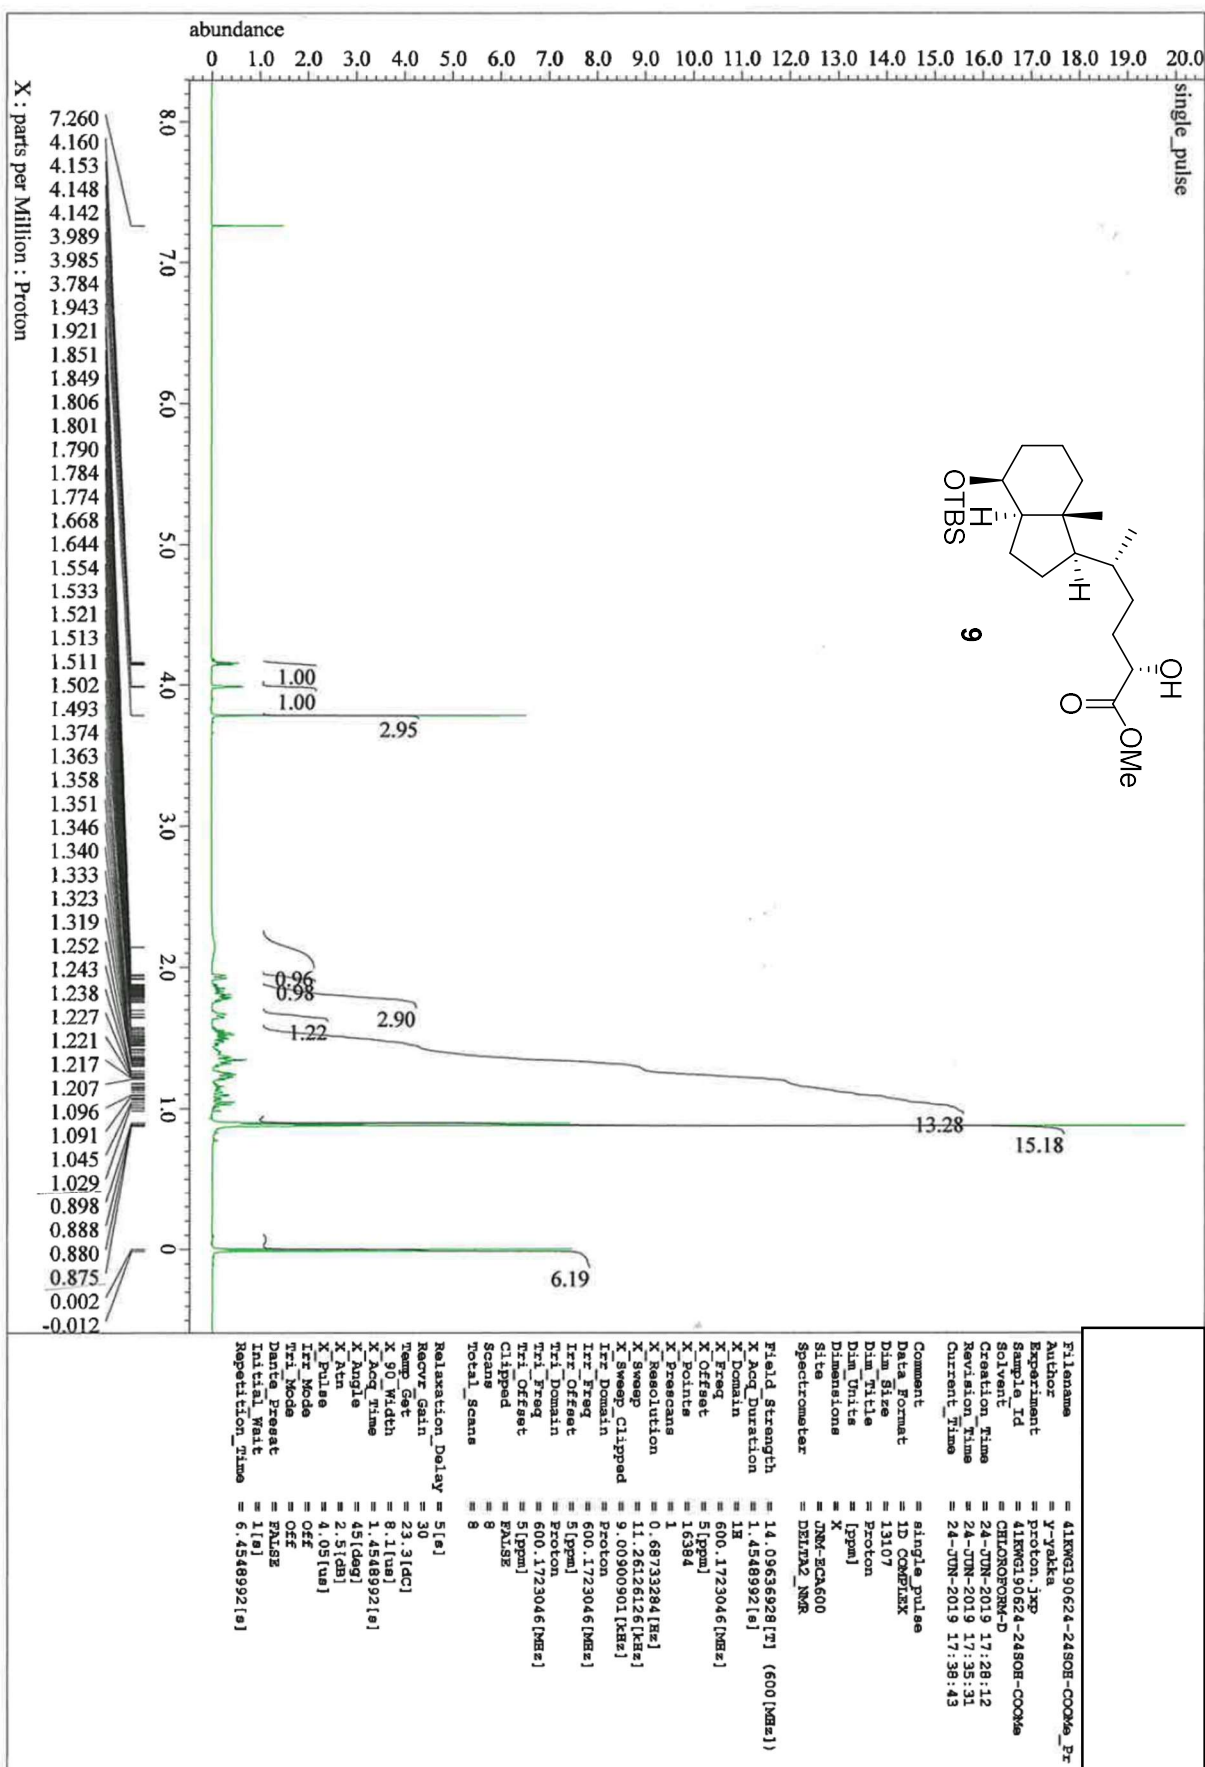

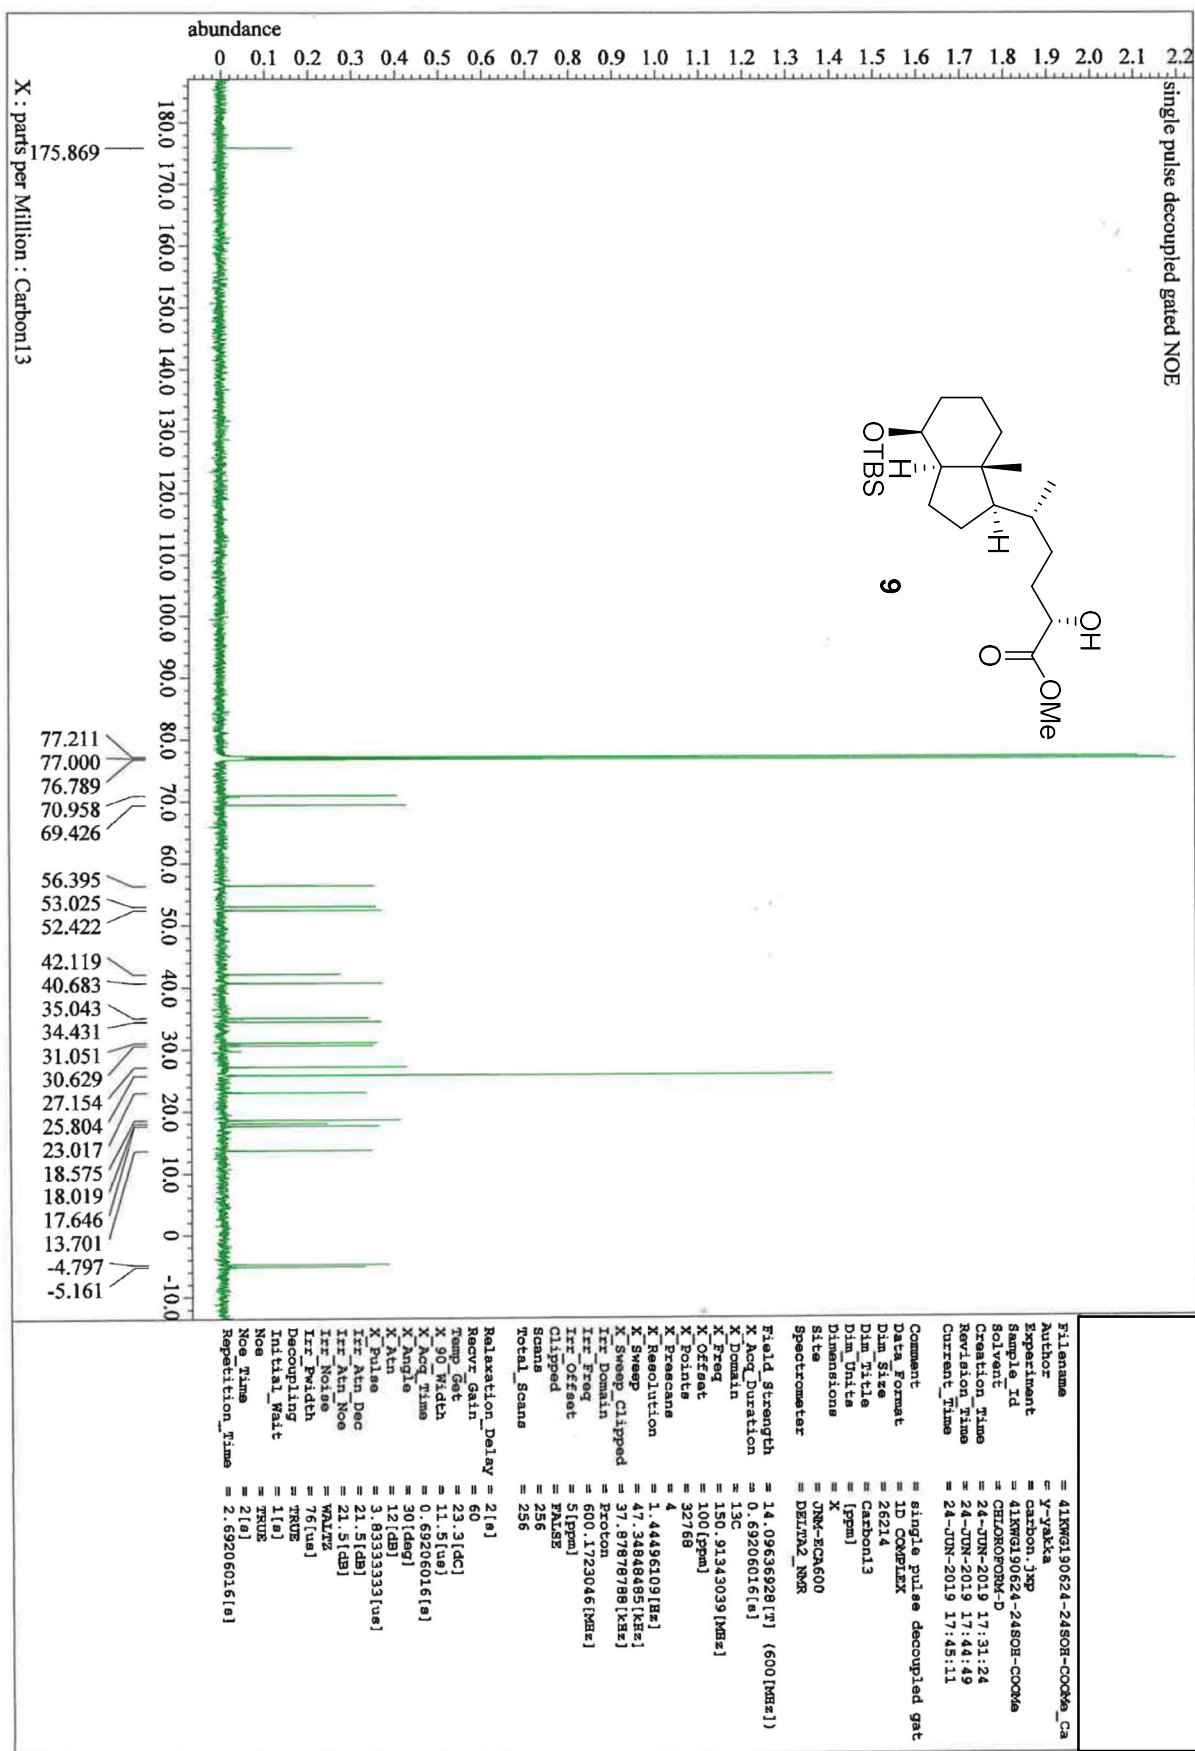



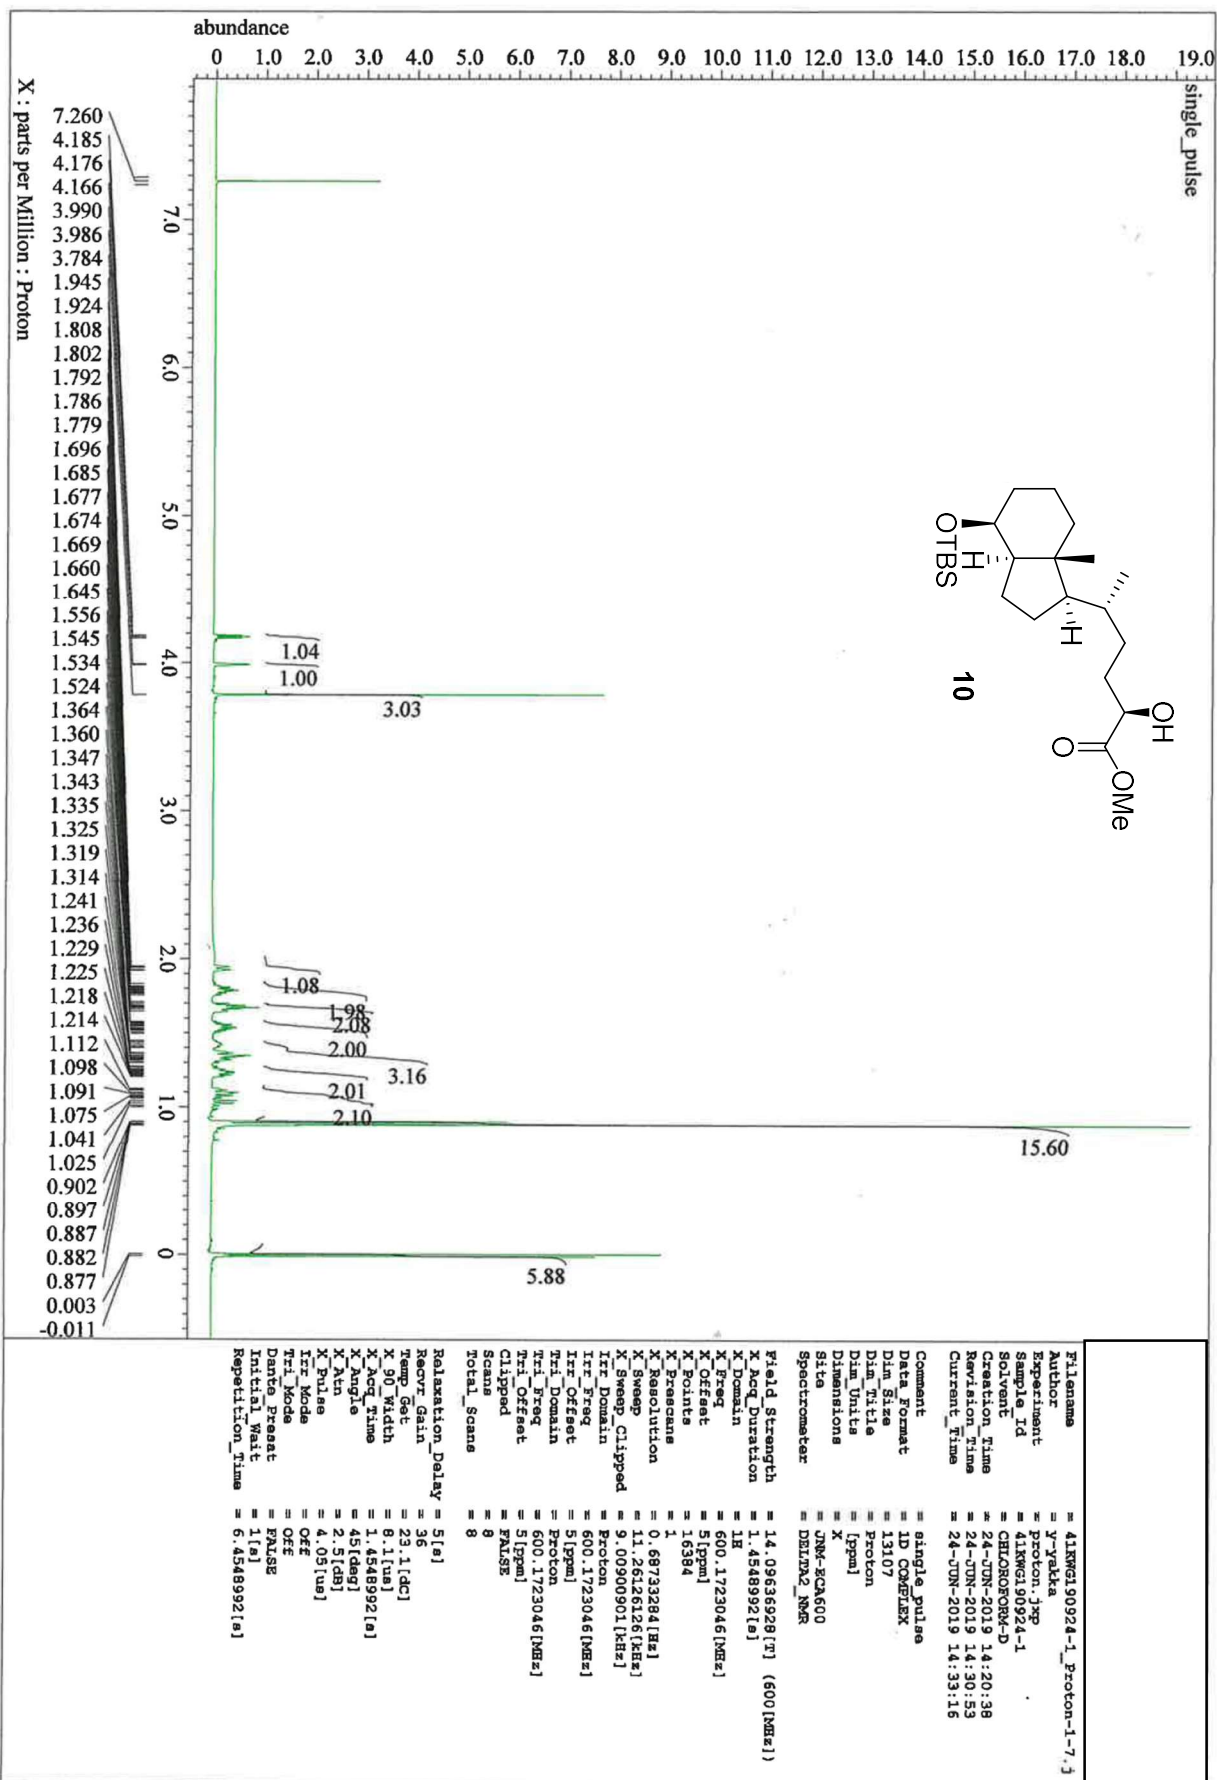



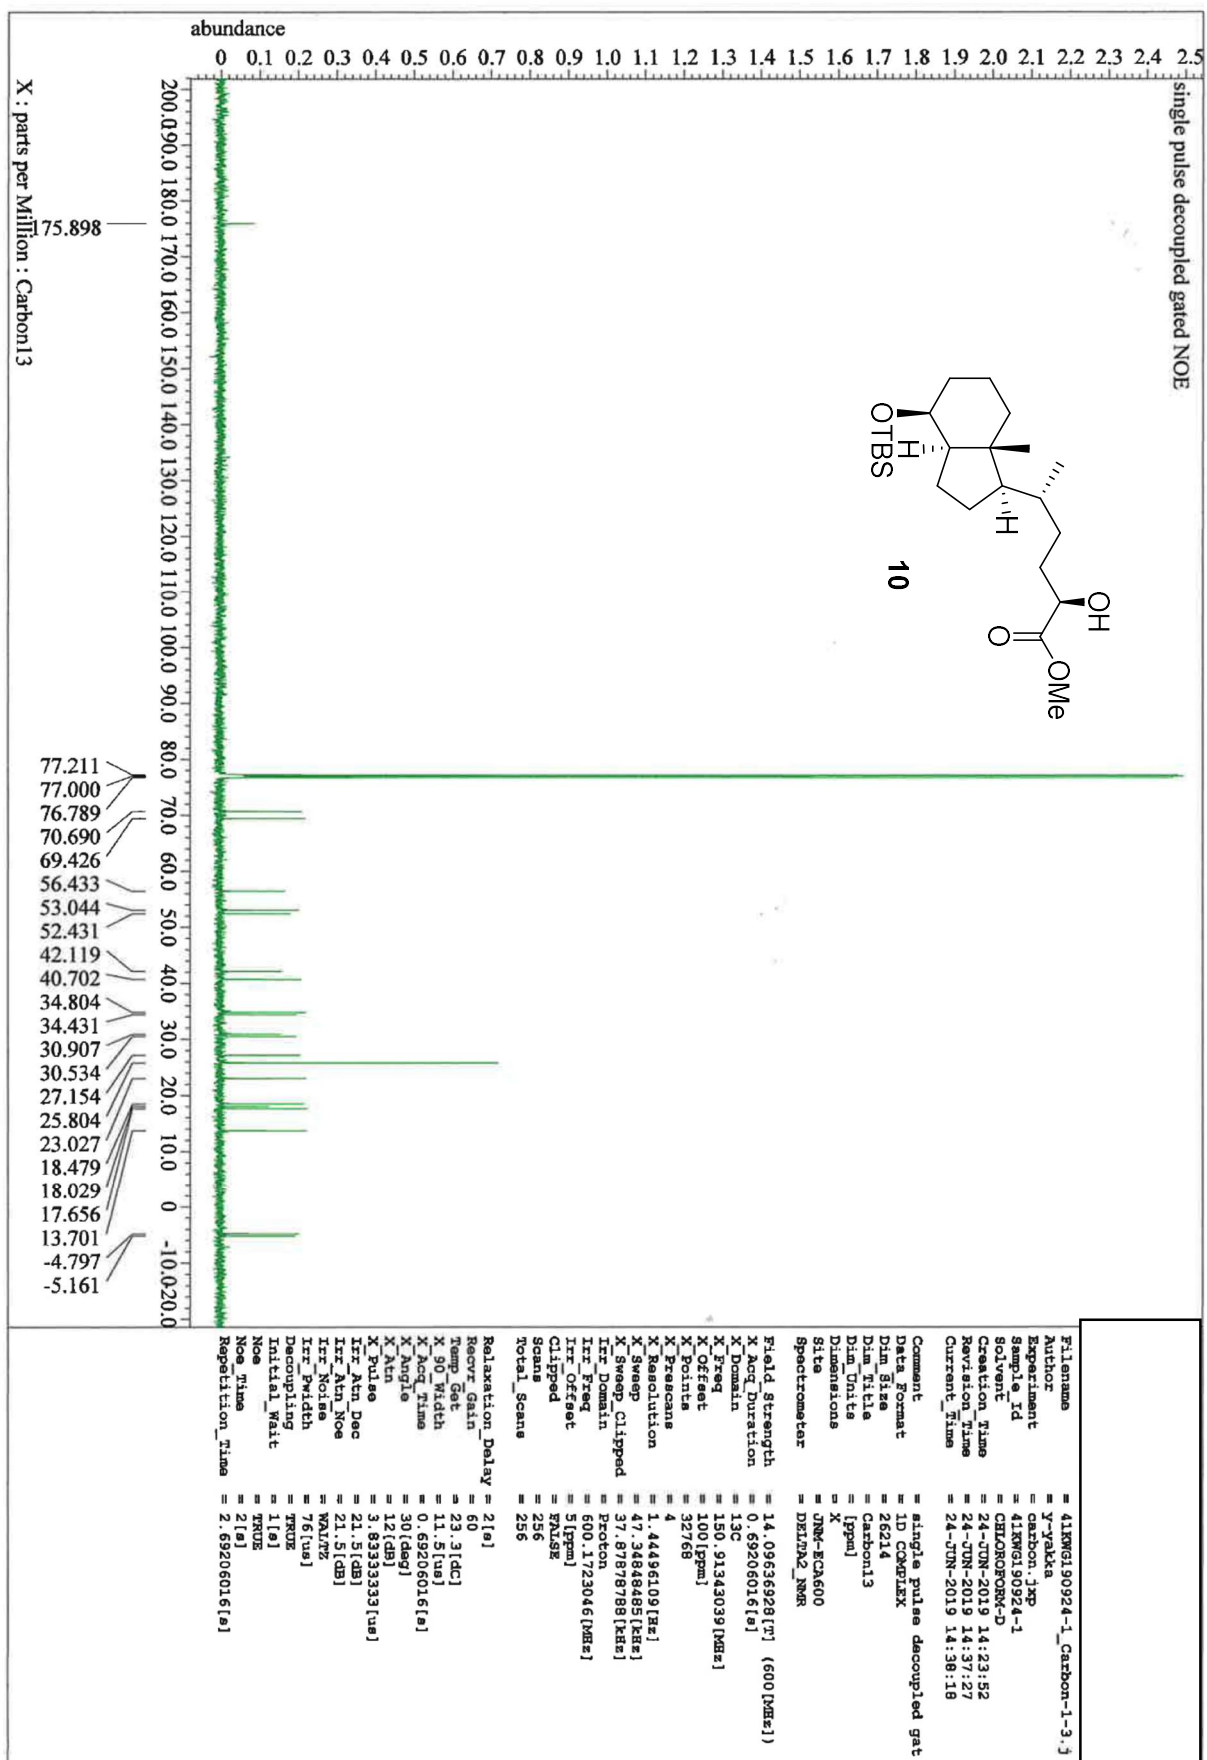



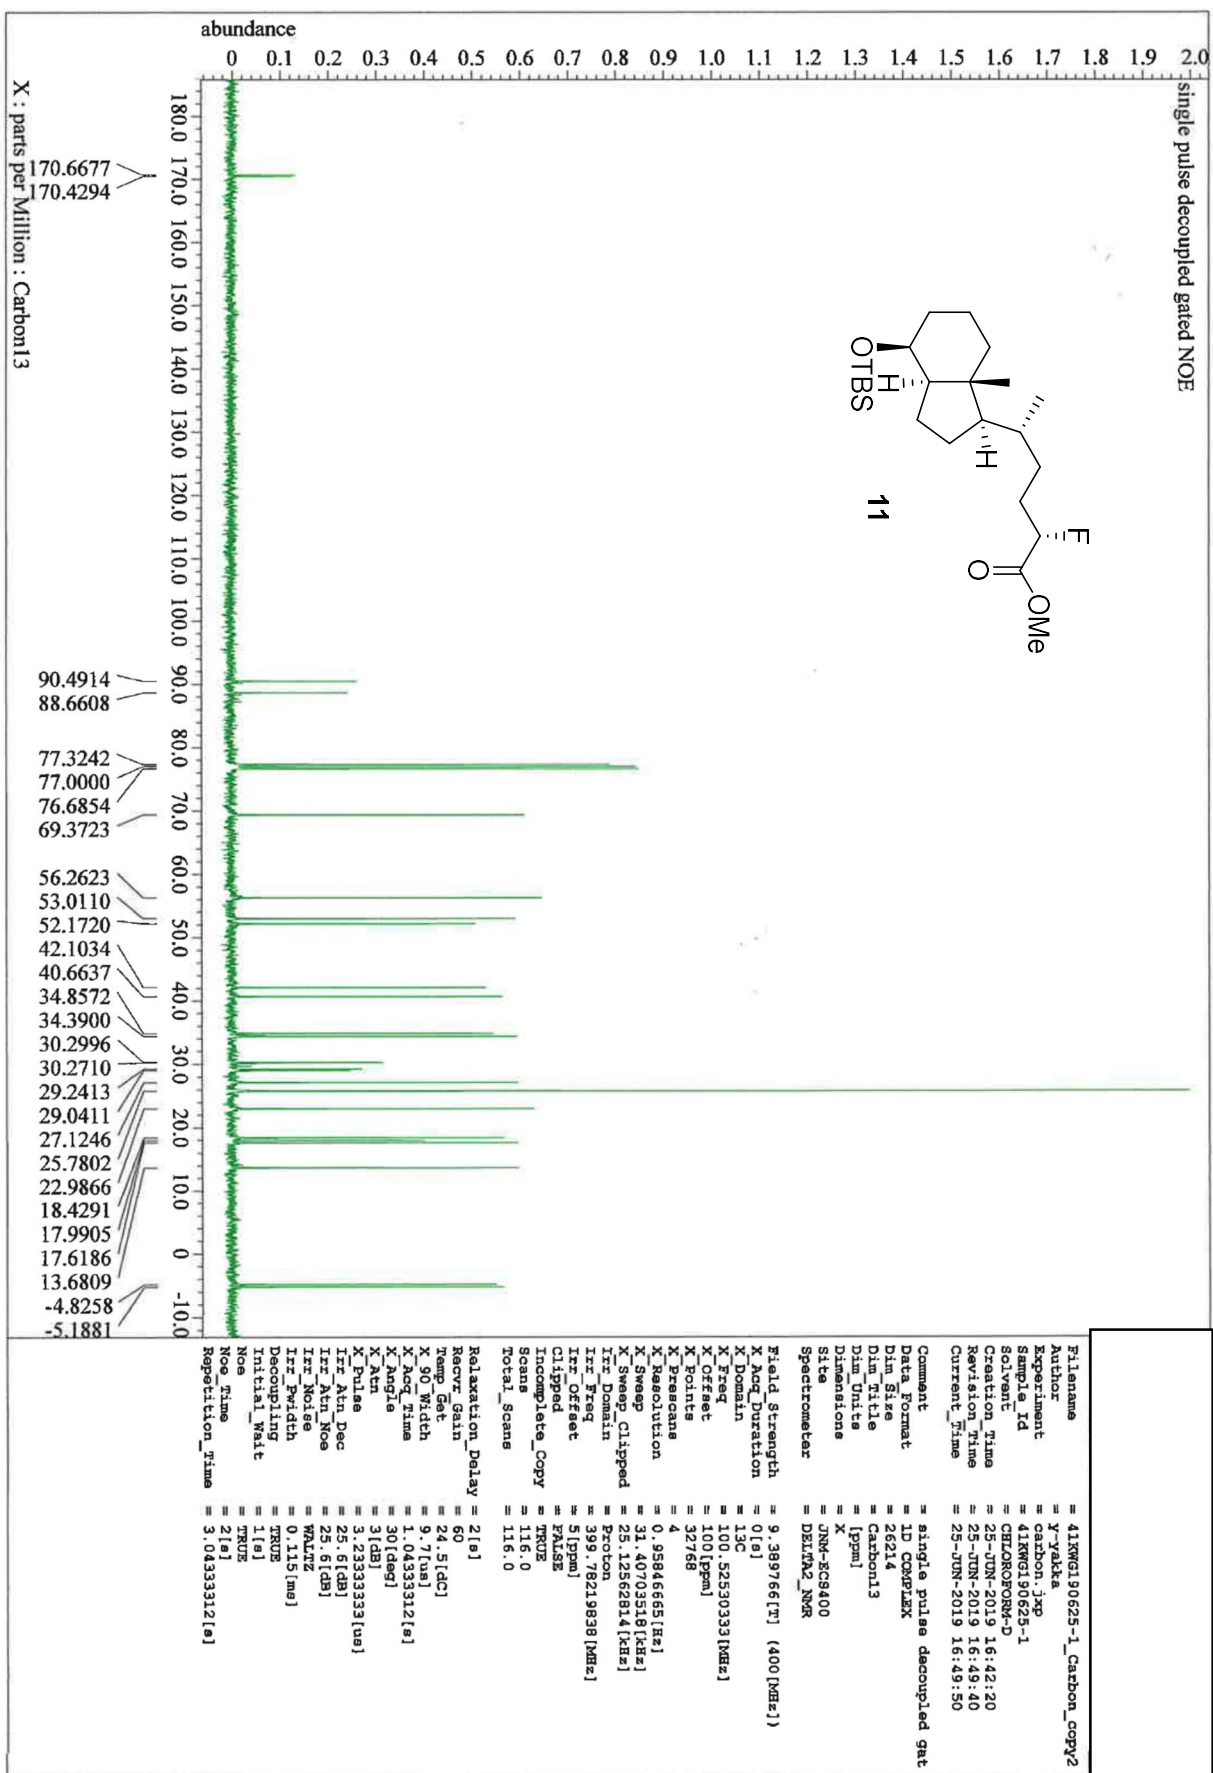

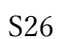

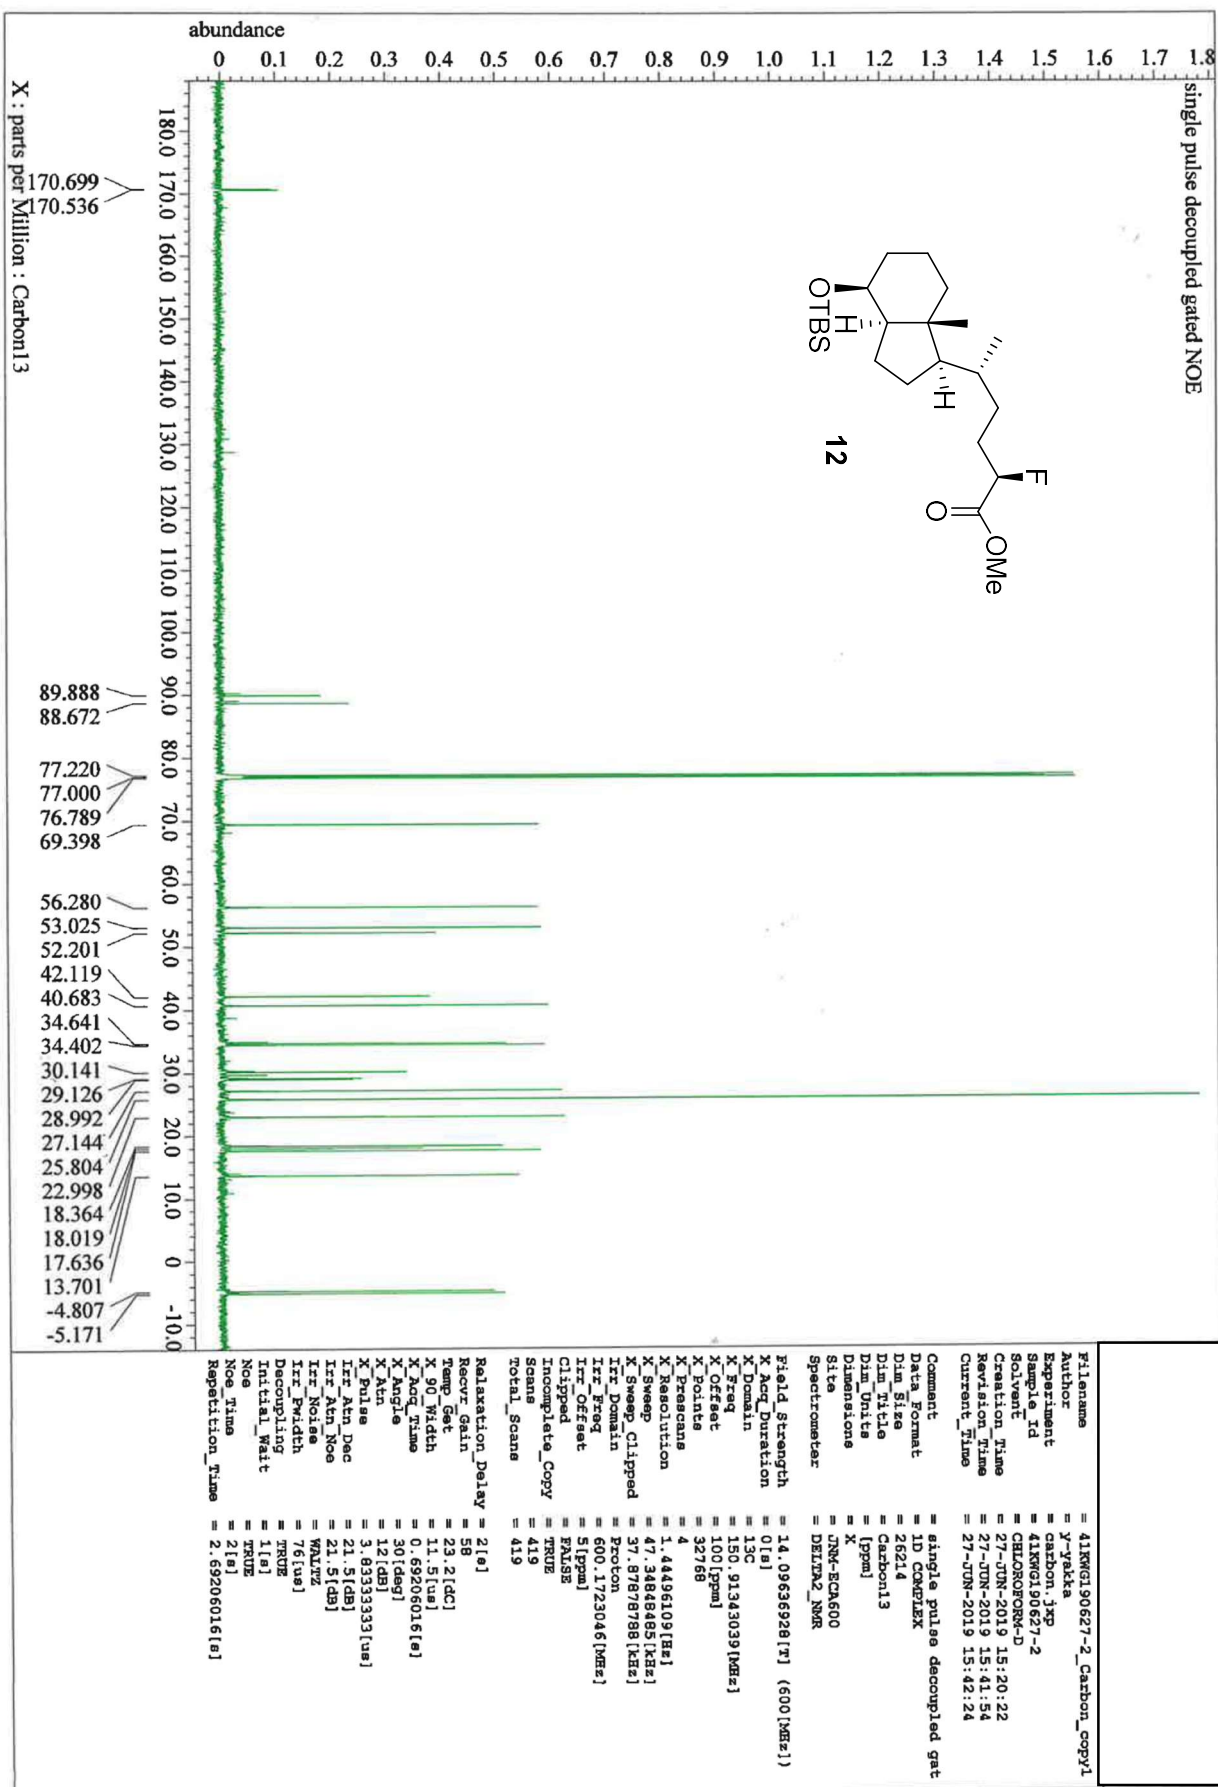



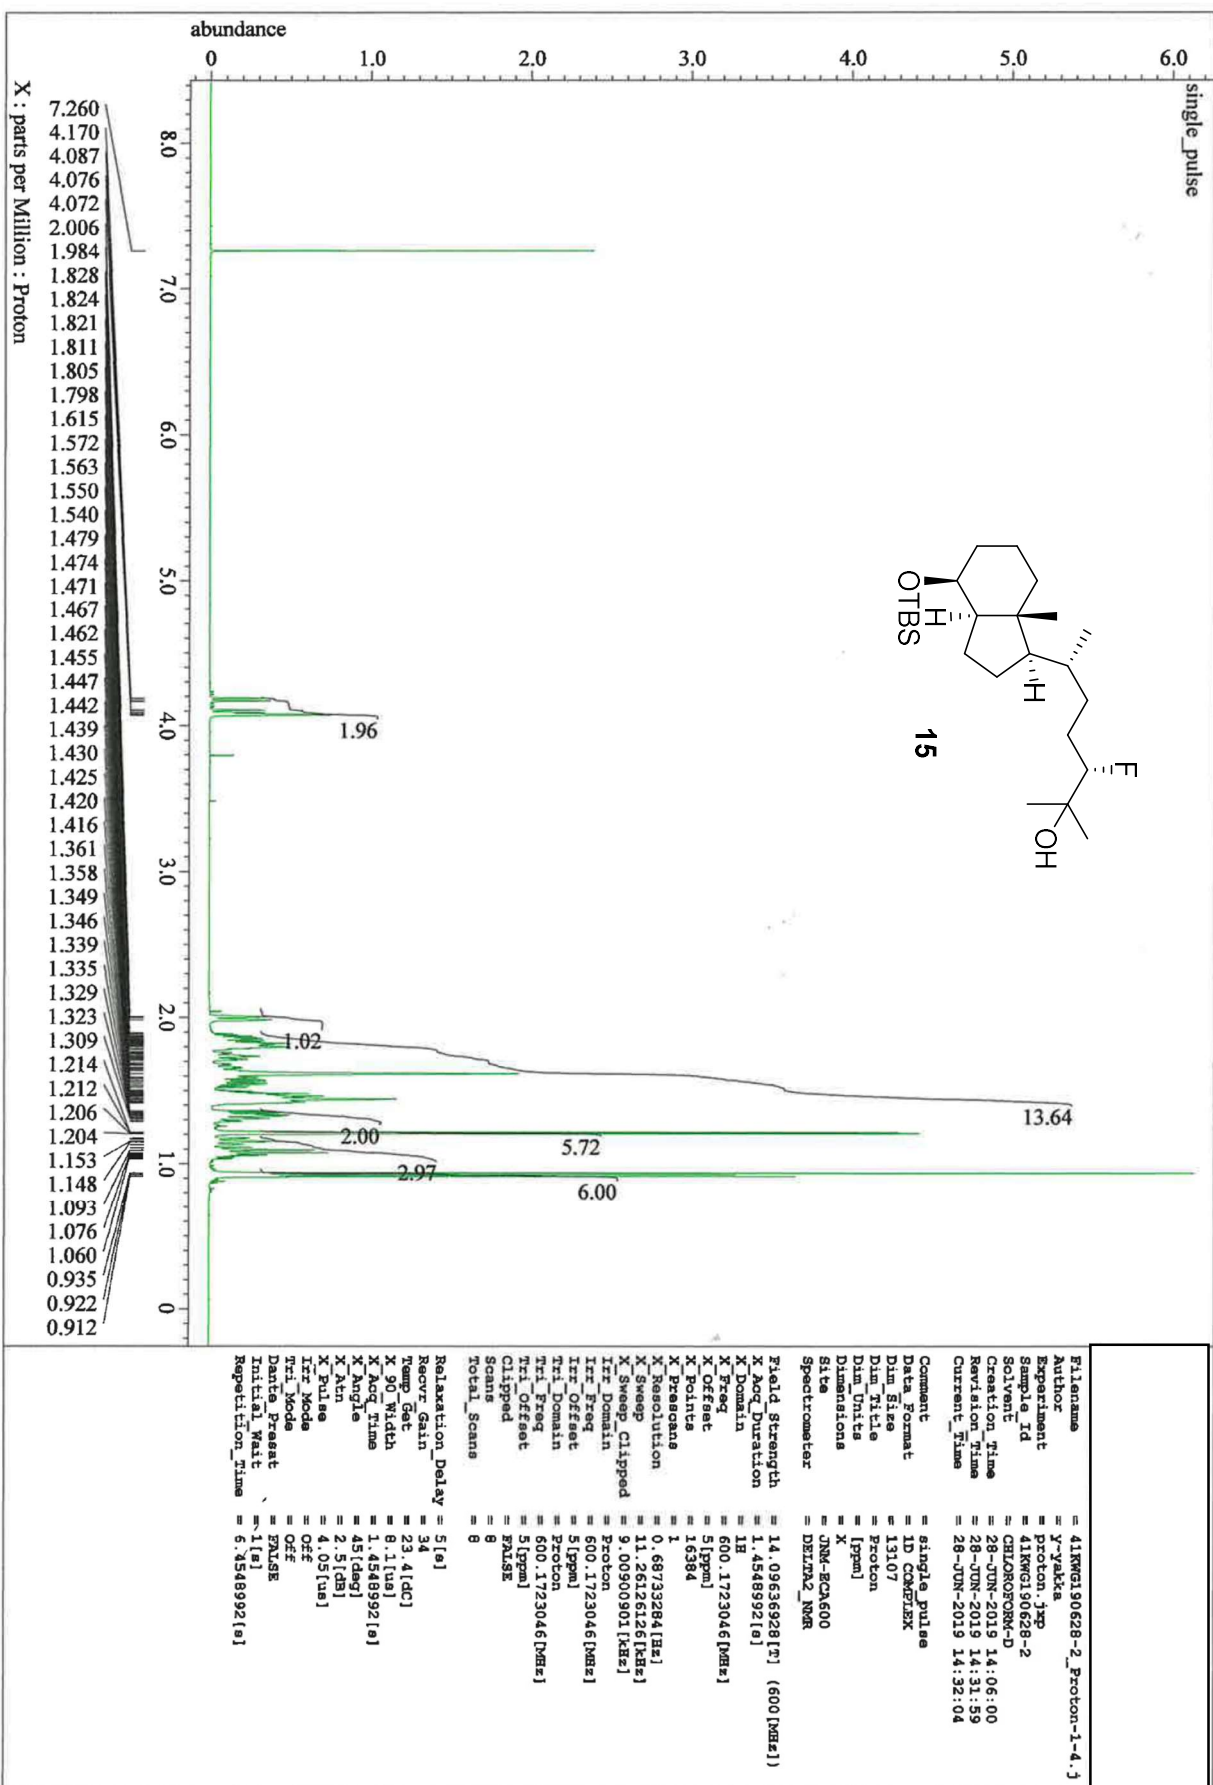



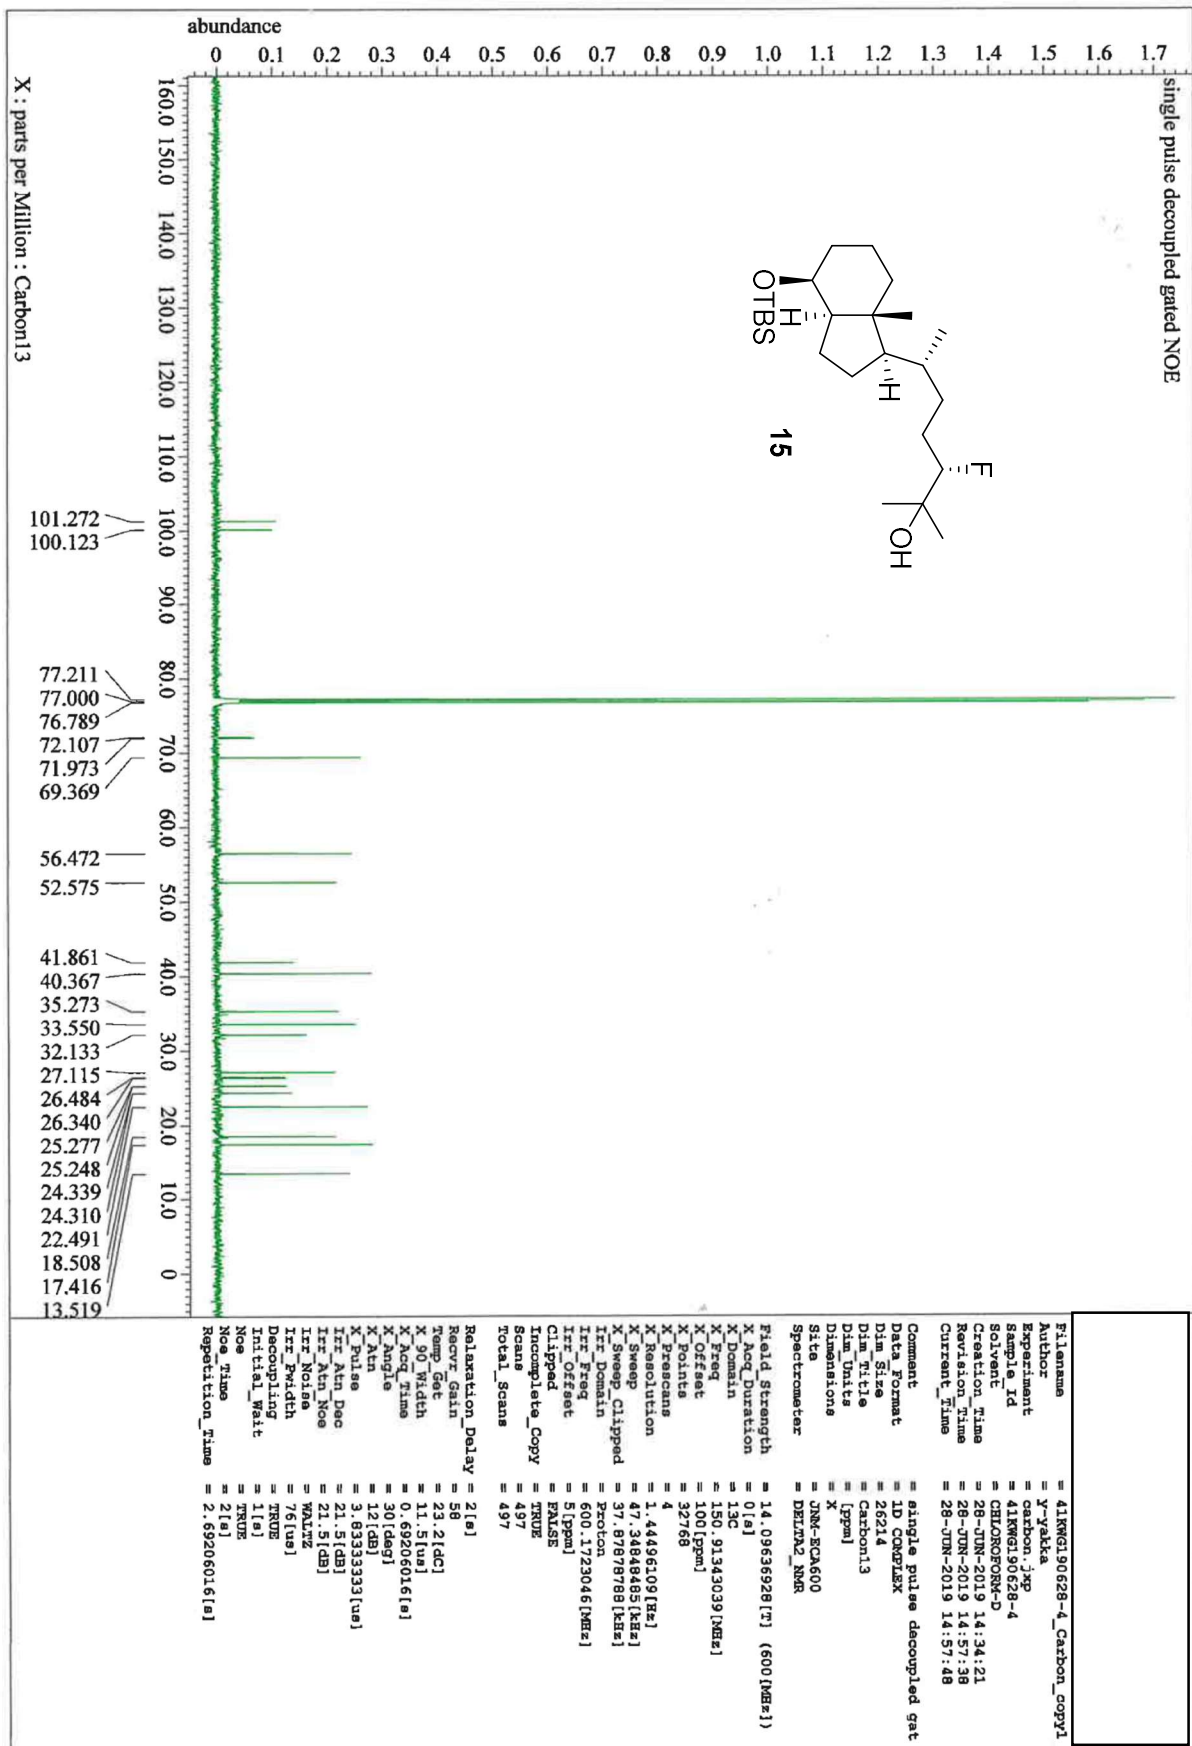

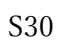

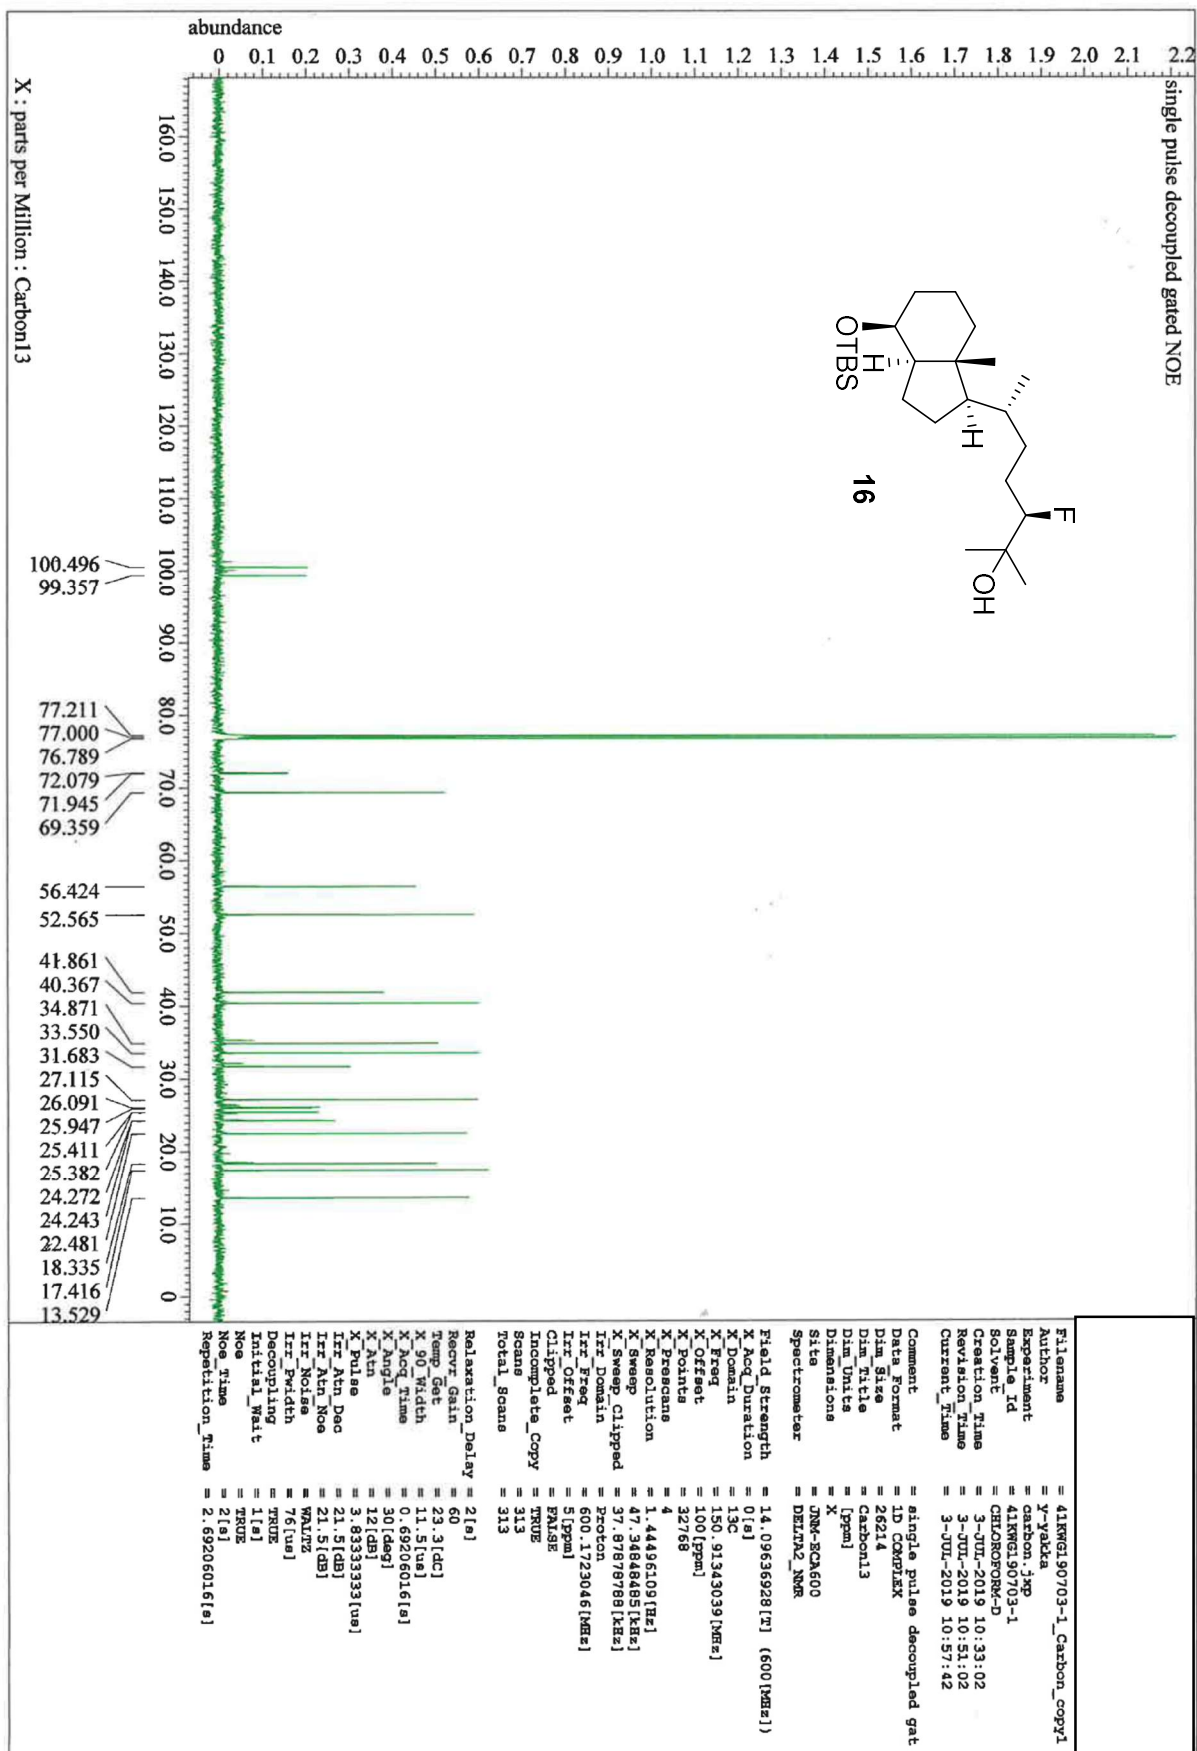

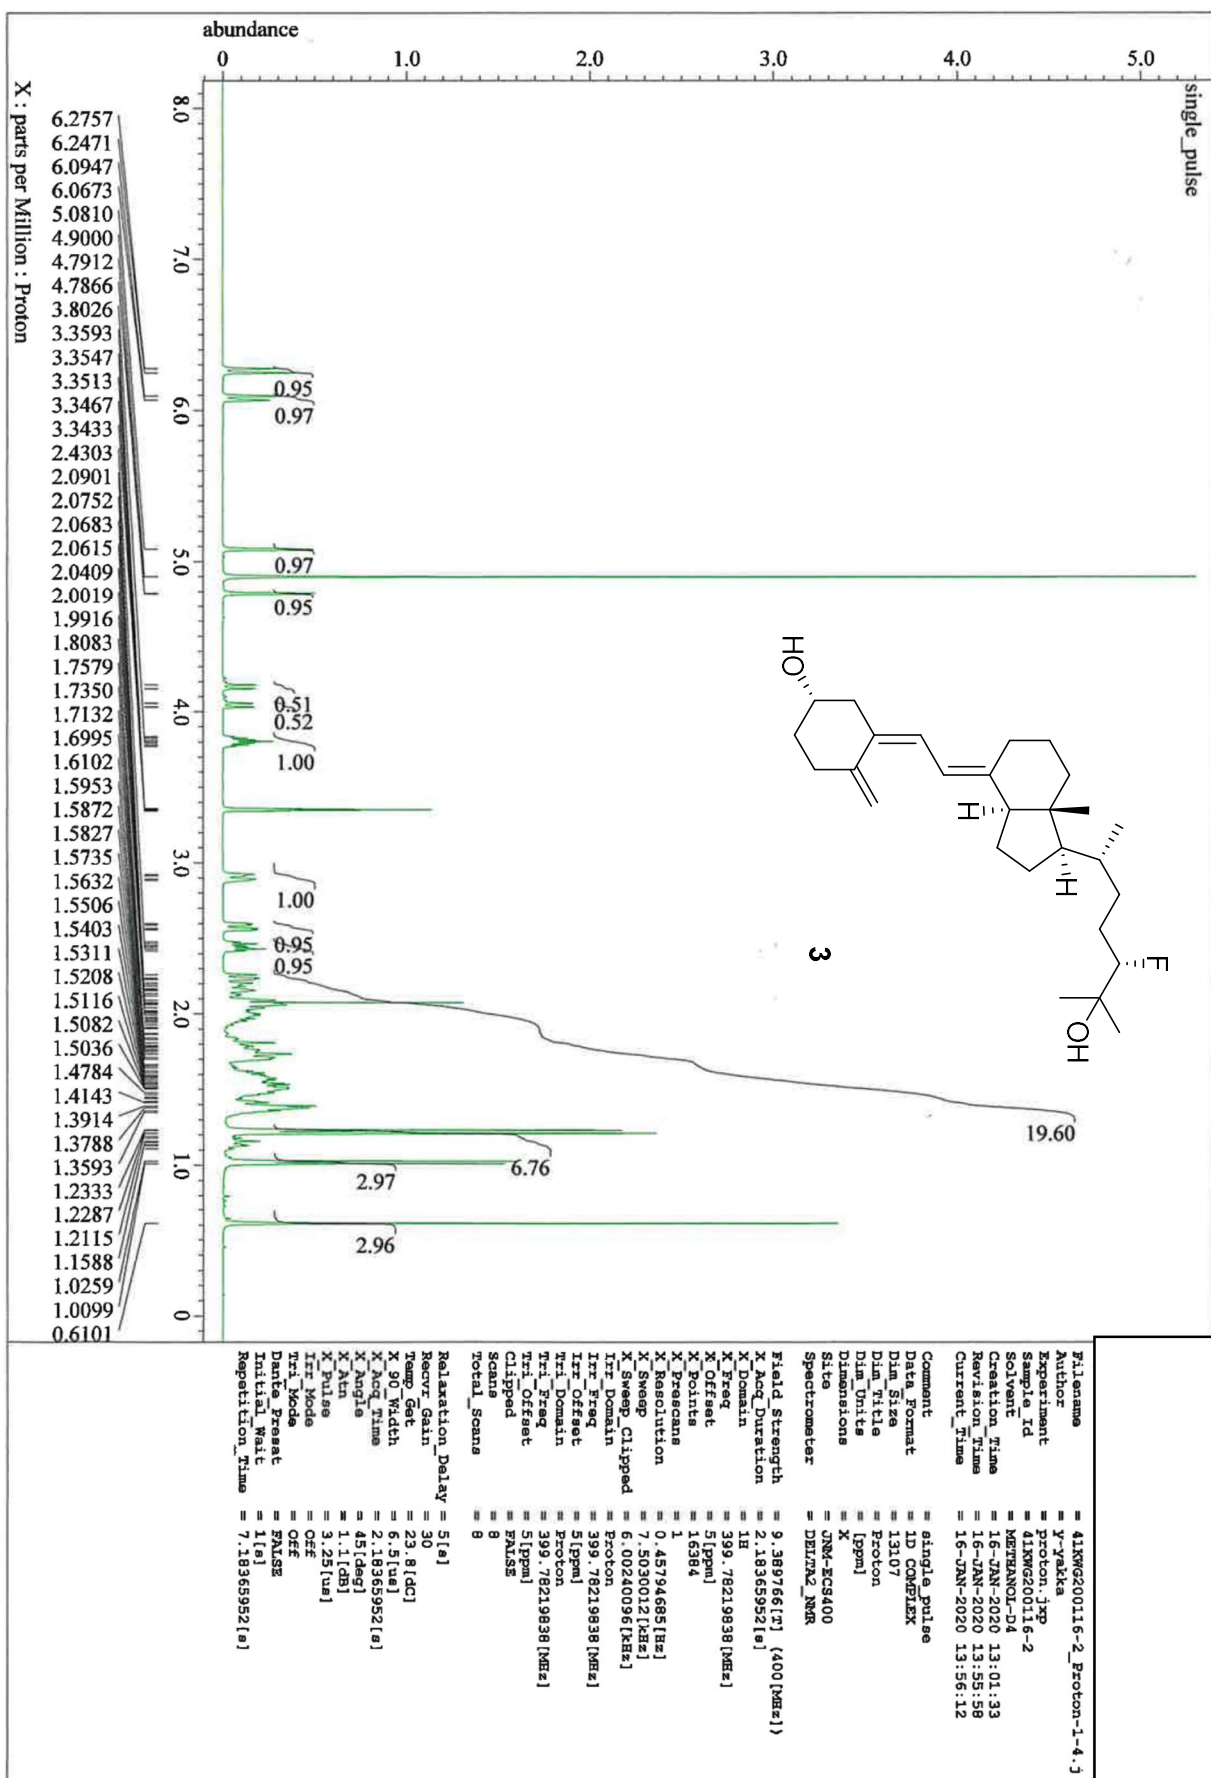





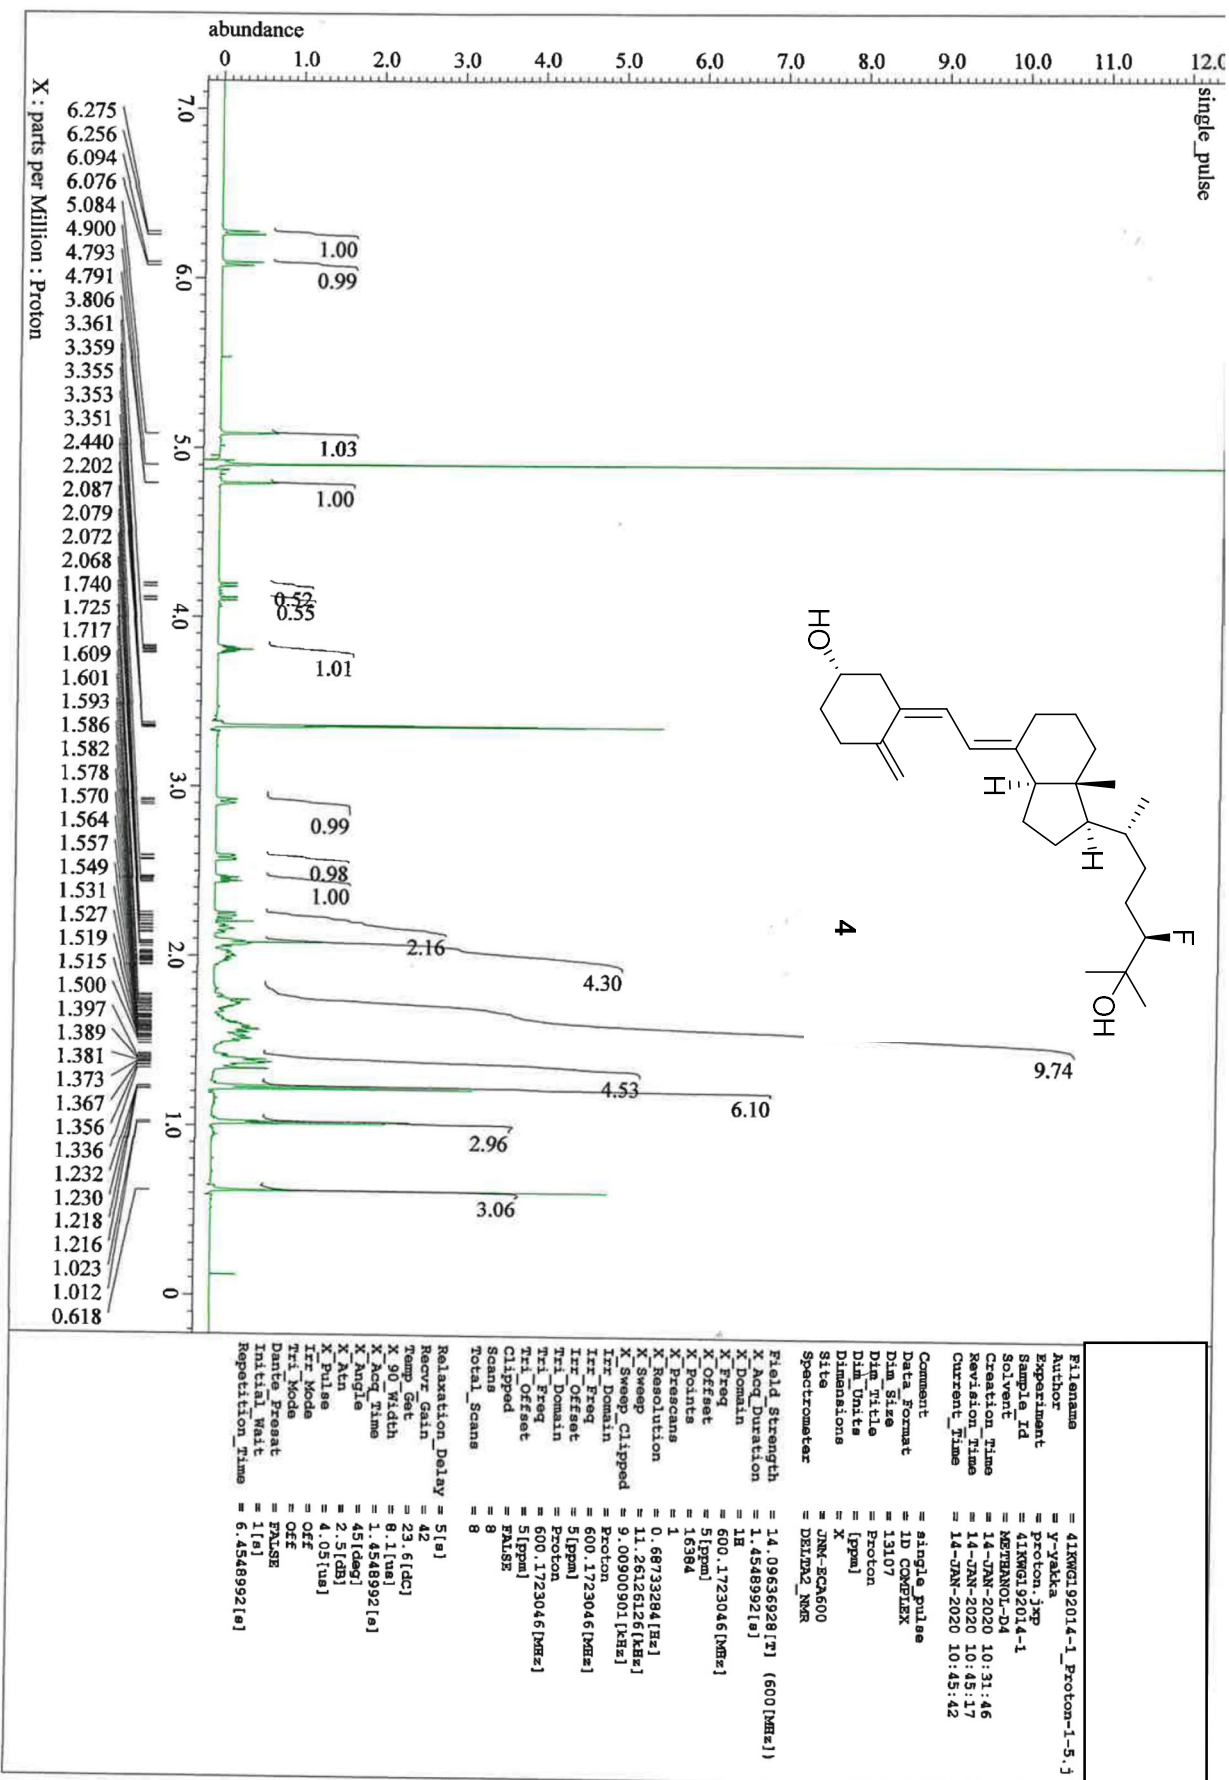

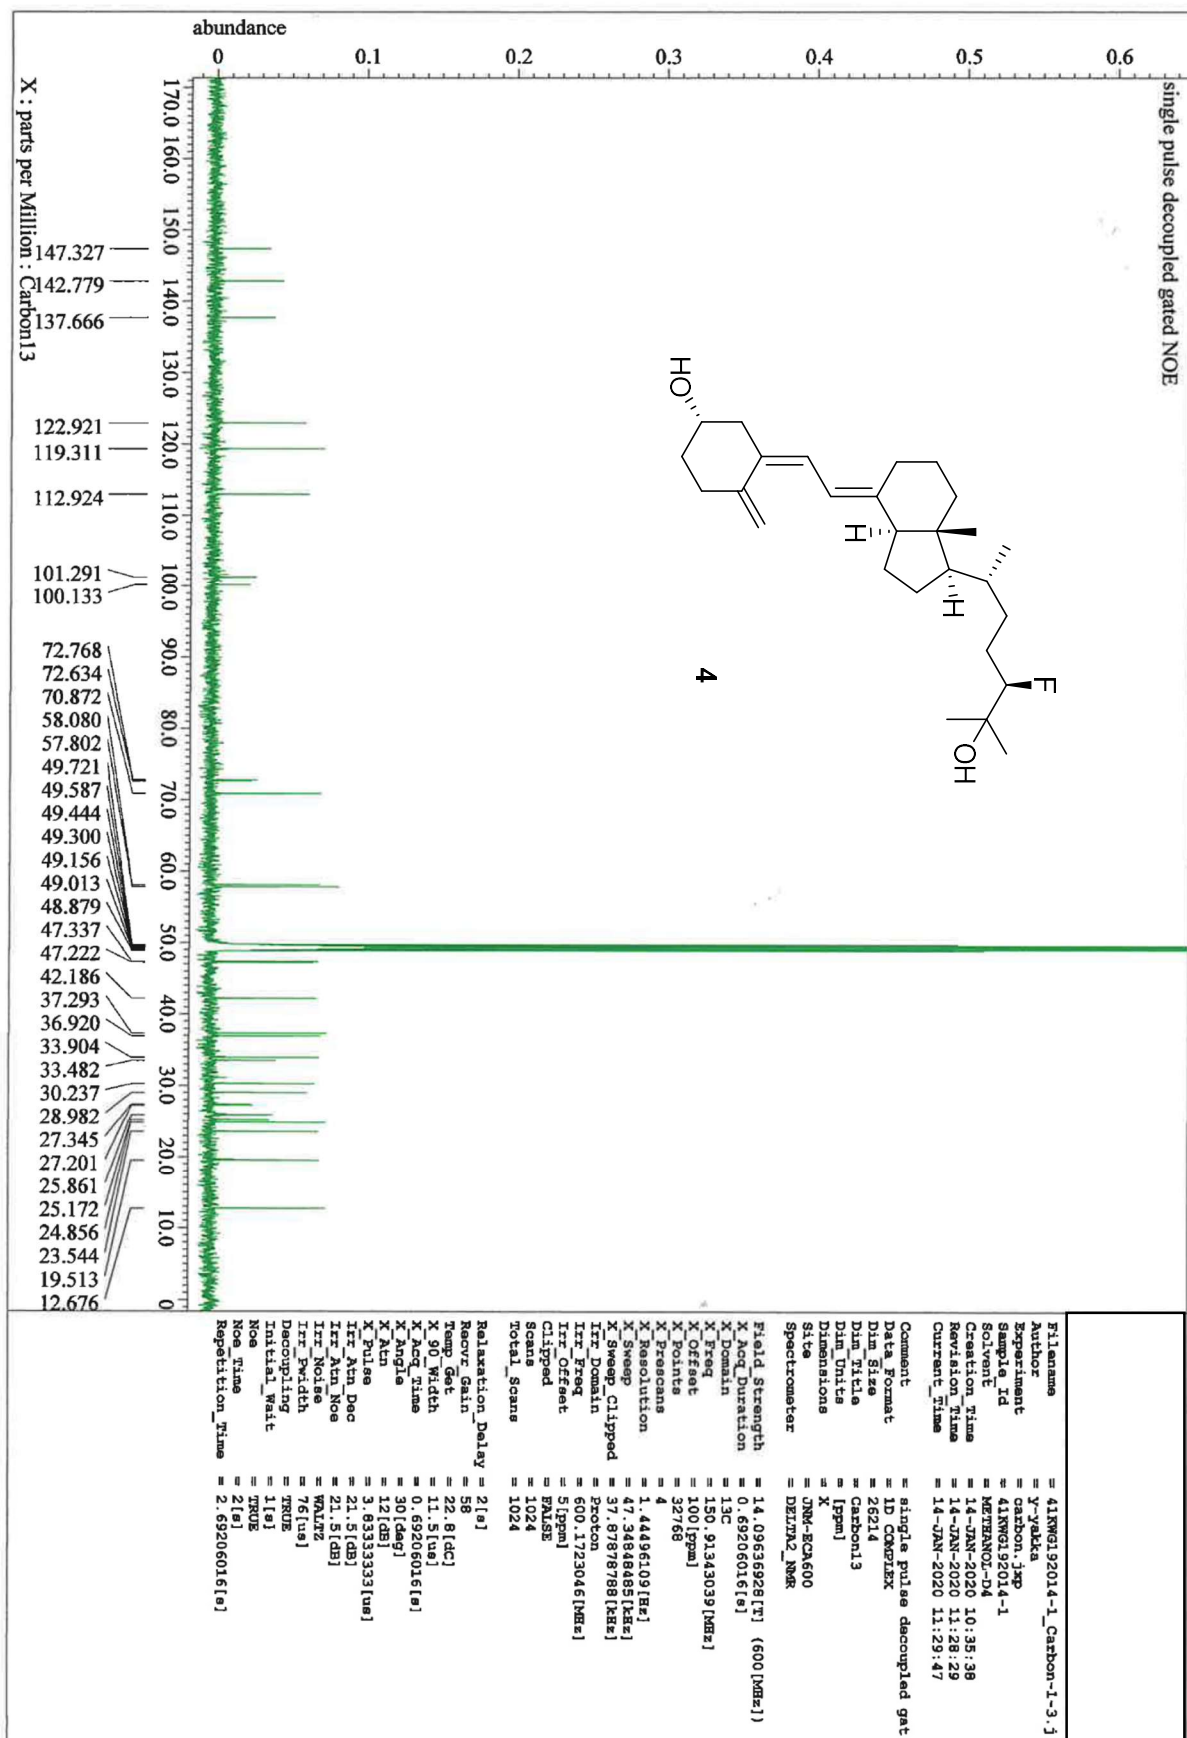

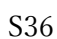

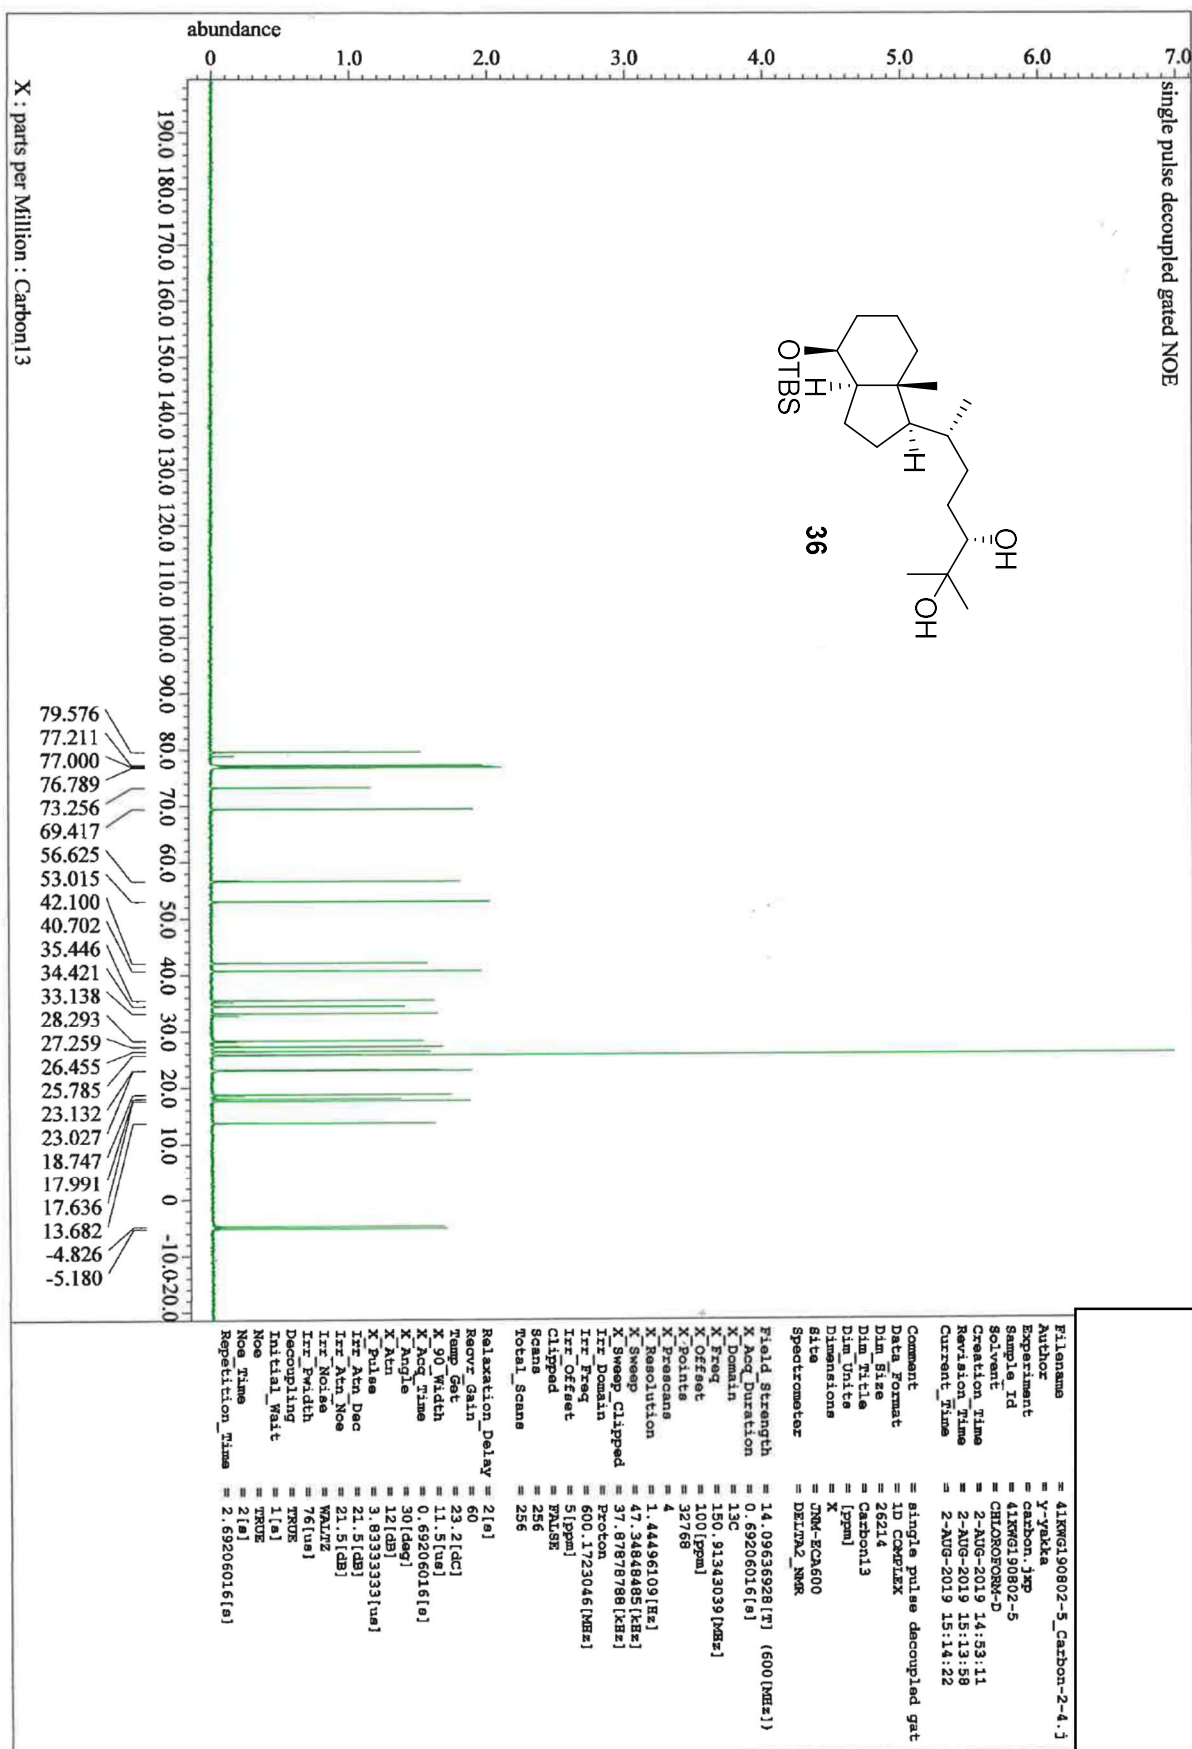

Supplement: s1 [file s1]
